# Supplementary material for: Synthesis and photophysical characterization of fluorescent indole nucleoside analogues
Source: Royal Society of Chemistry journal article supplement (doi:10.1039/d3ra03457g), 2023-01-01

## Synthesis and Photophysical Characterization of Fluorescent Indole Nucleoside Analogues

Jacob M. Sawyer,<sup>1</sup> Kellan T. Passow,<sup>2</sup> and Daniel A. Harki<sup>1,2,\*</sup>

<sup>1</sup>Department of Chemistry, <sup>2</sup>Department of Medicinal Chemistry, University of Minnesota, Minneapolis, Minnesota 55455, United States

### Table of Contents for Supporting Information

|                                               | <b>Pages</b> |
|-----------------------------------------------|--------------|
| I. <sup>1</sup> H and <sup>13</sup> C Spectra | S2-S33       |

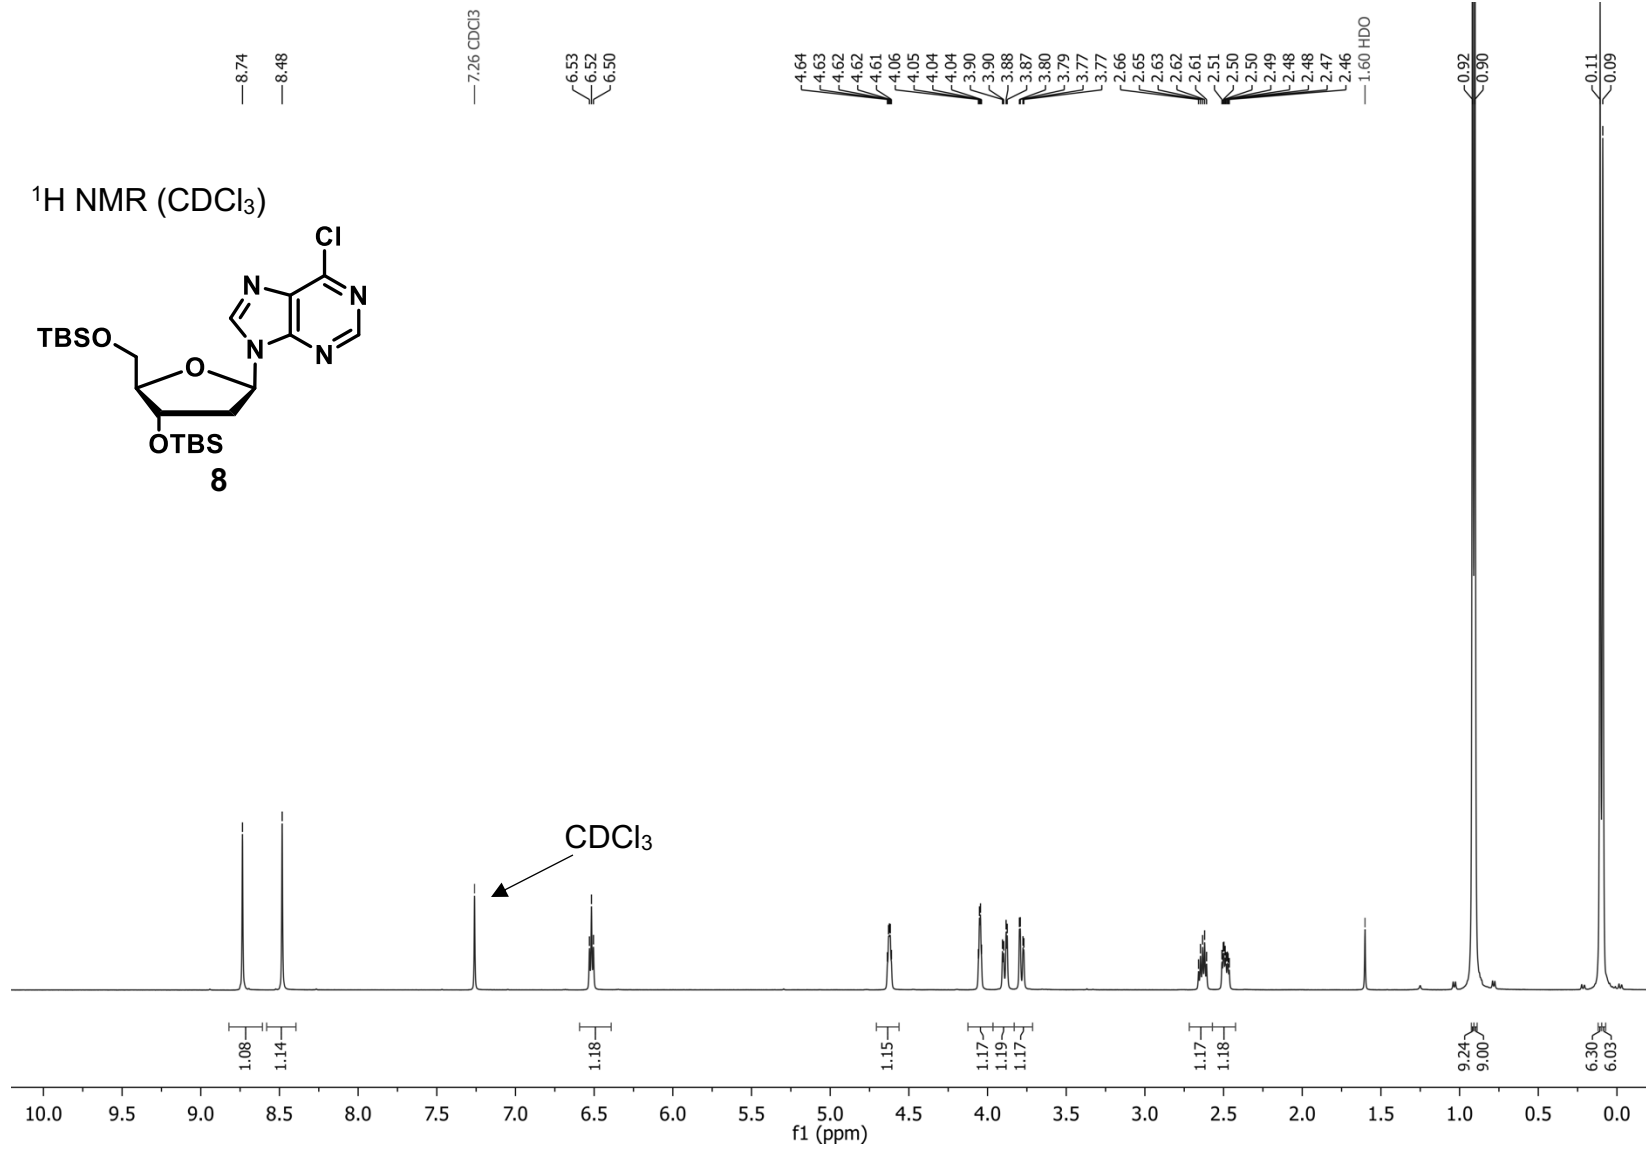

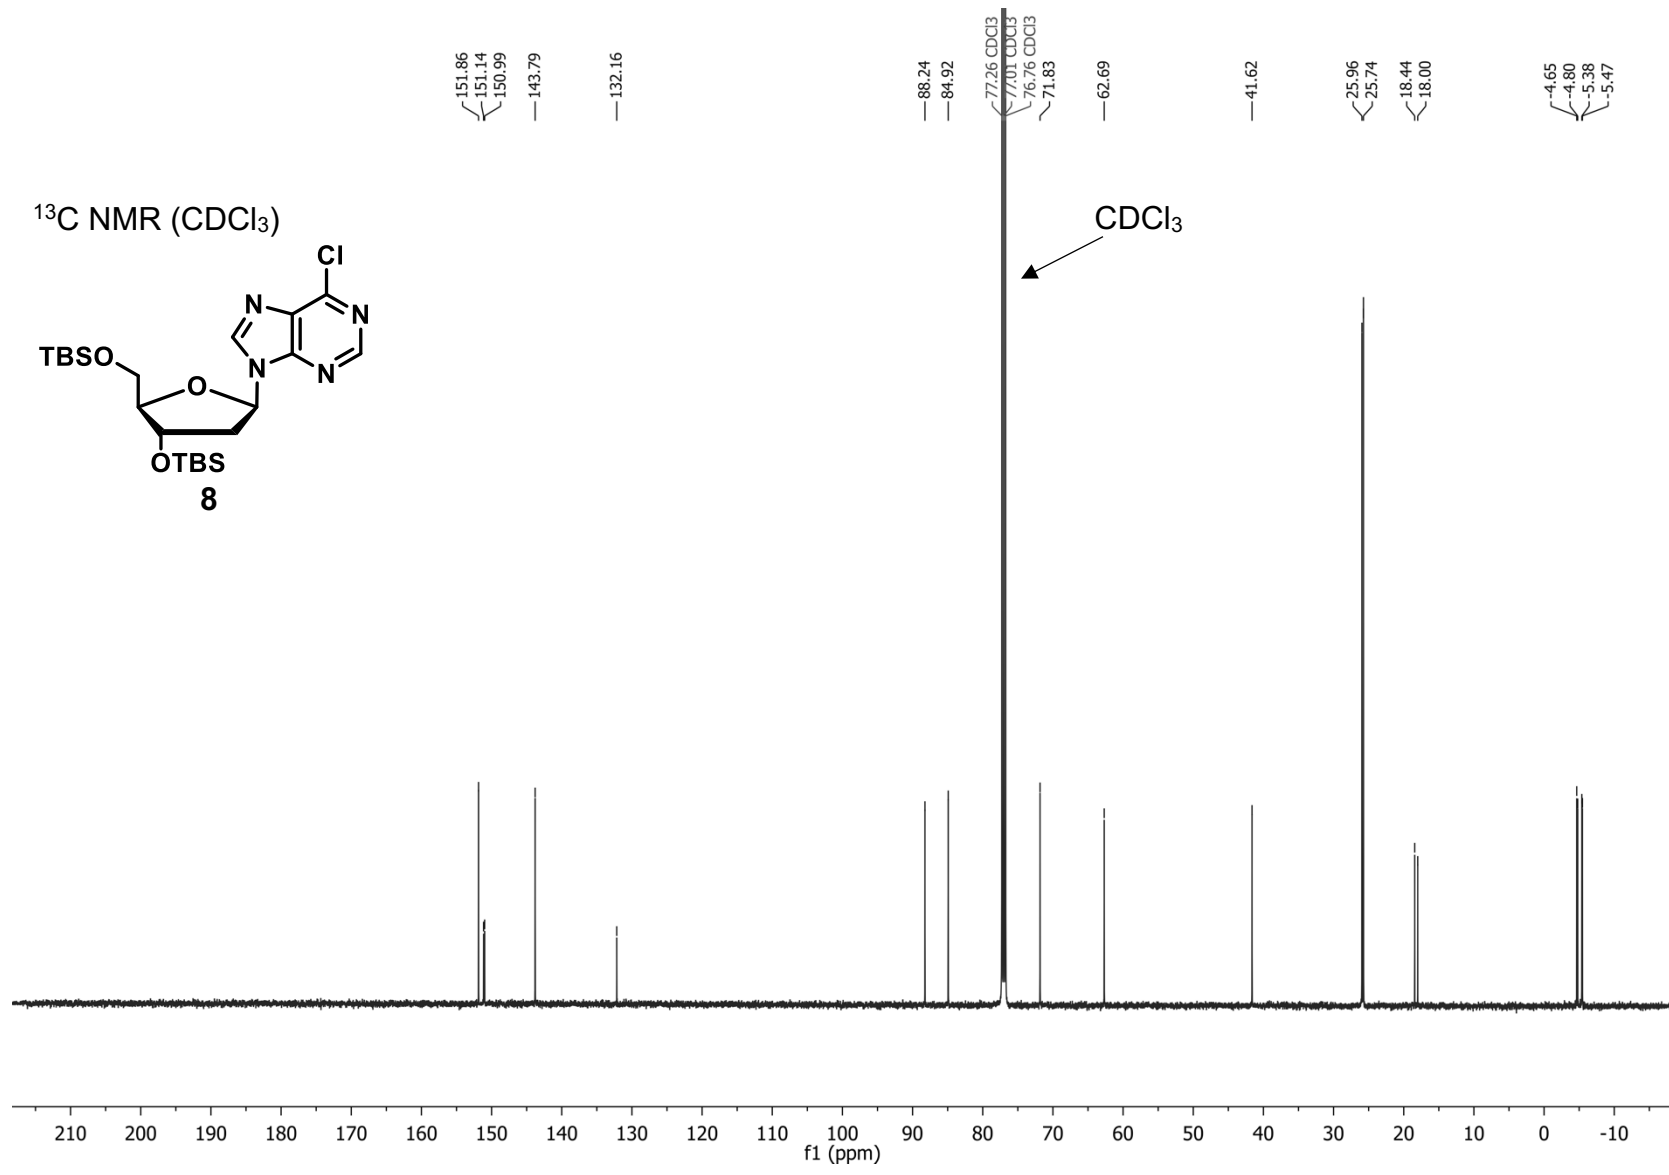

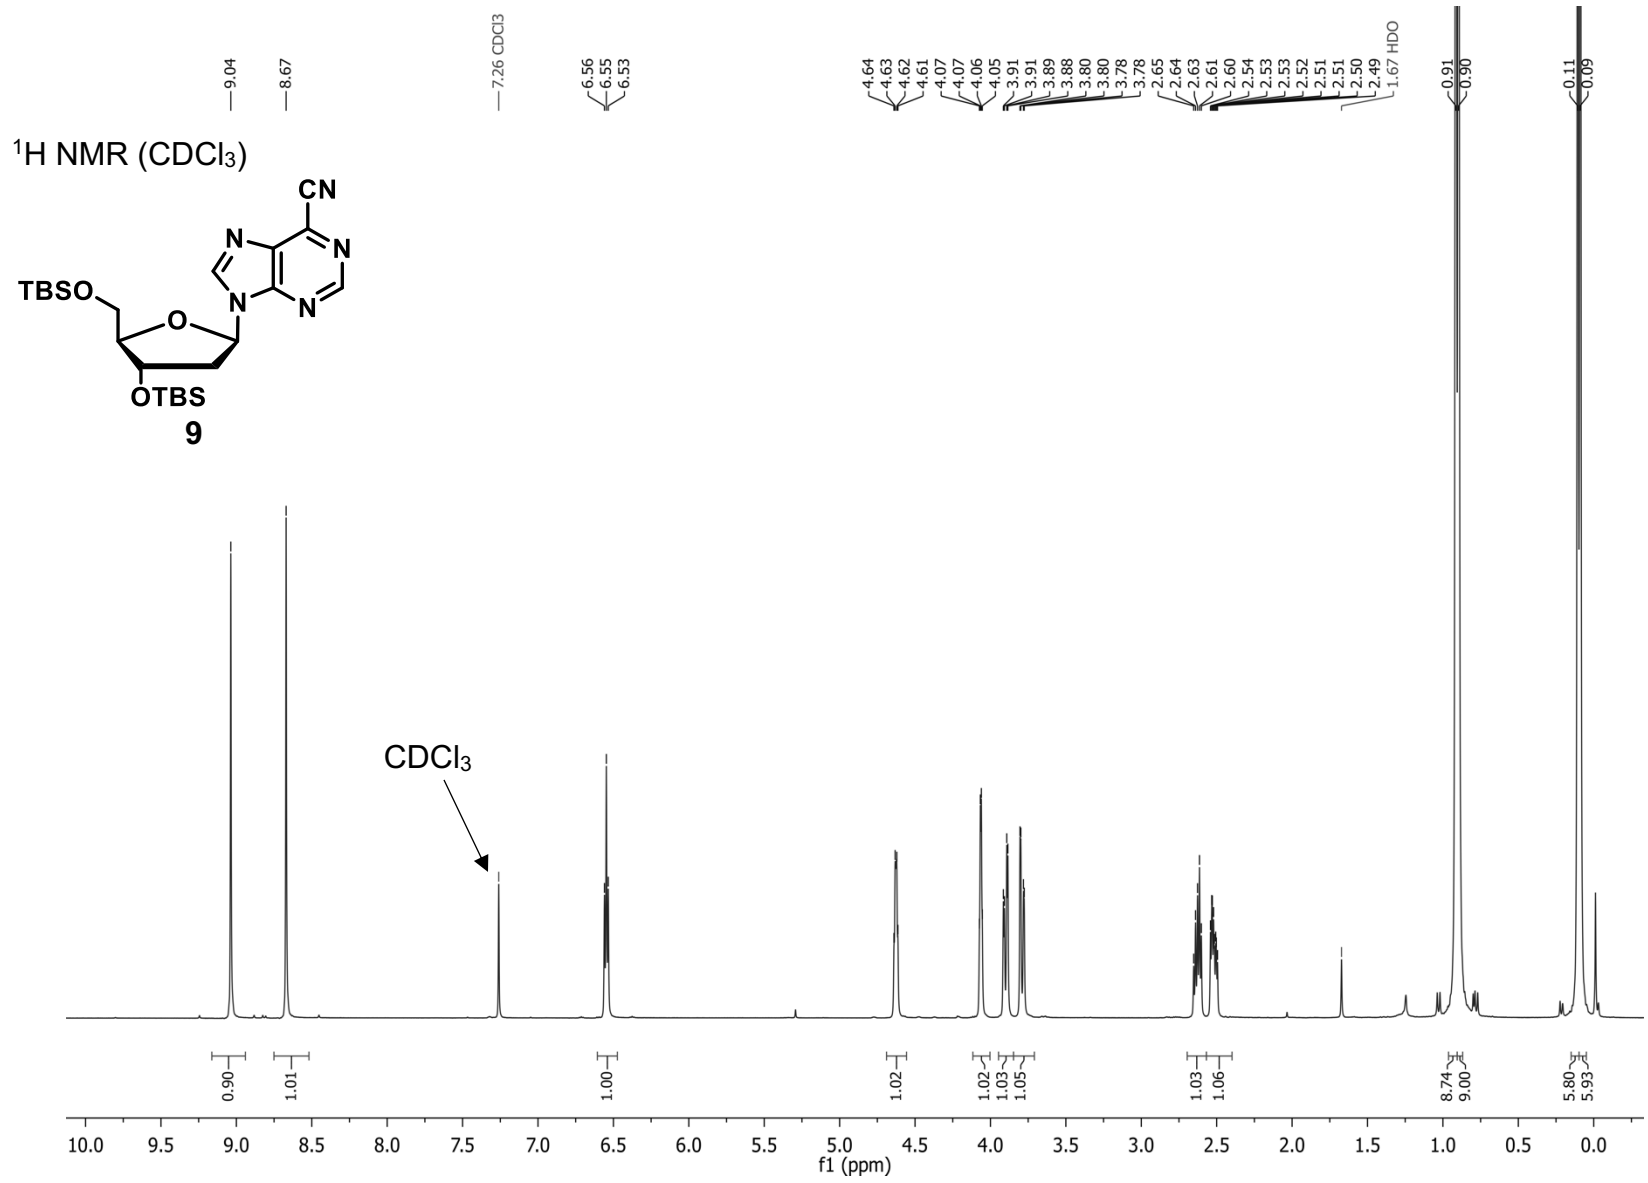

<sup>13</sup>C NMR (CDCl<sub>3</sub>)

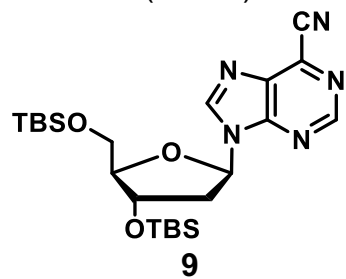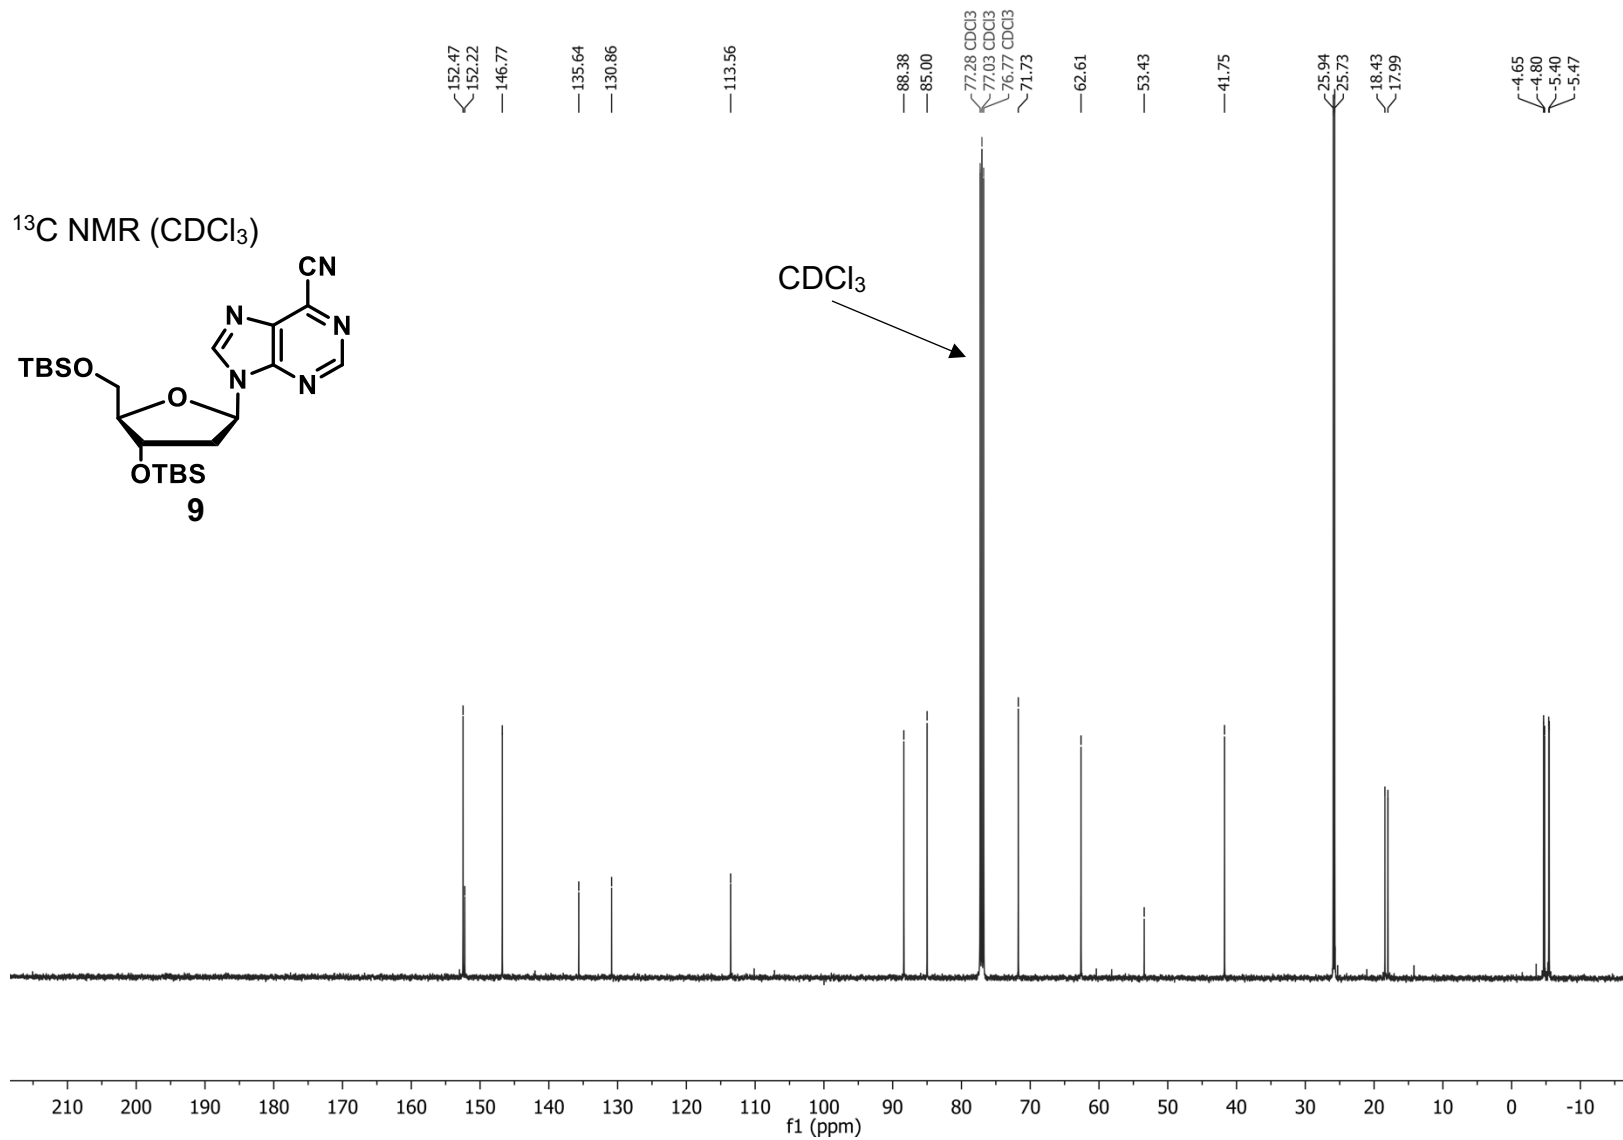

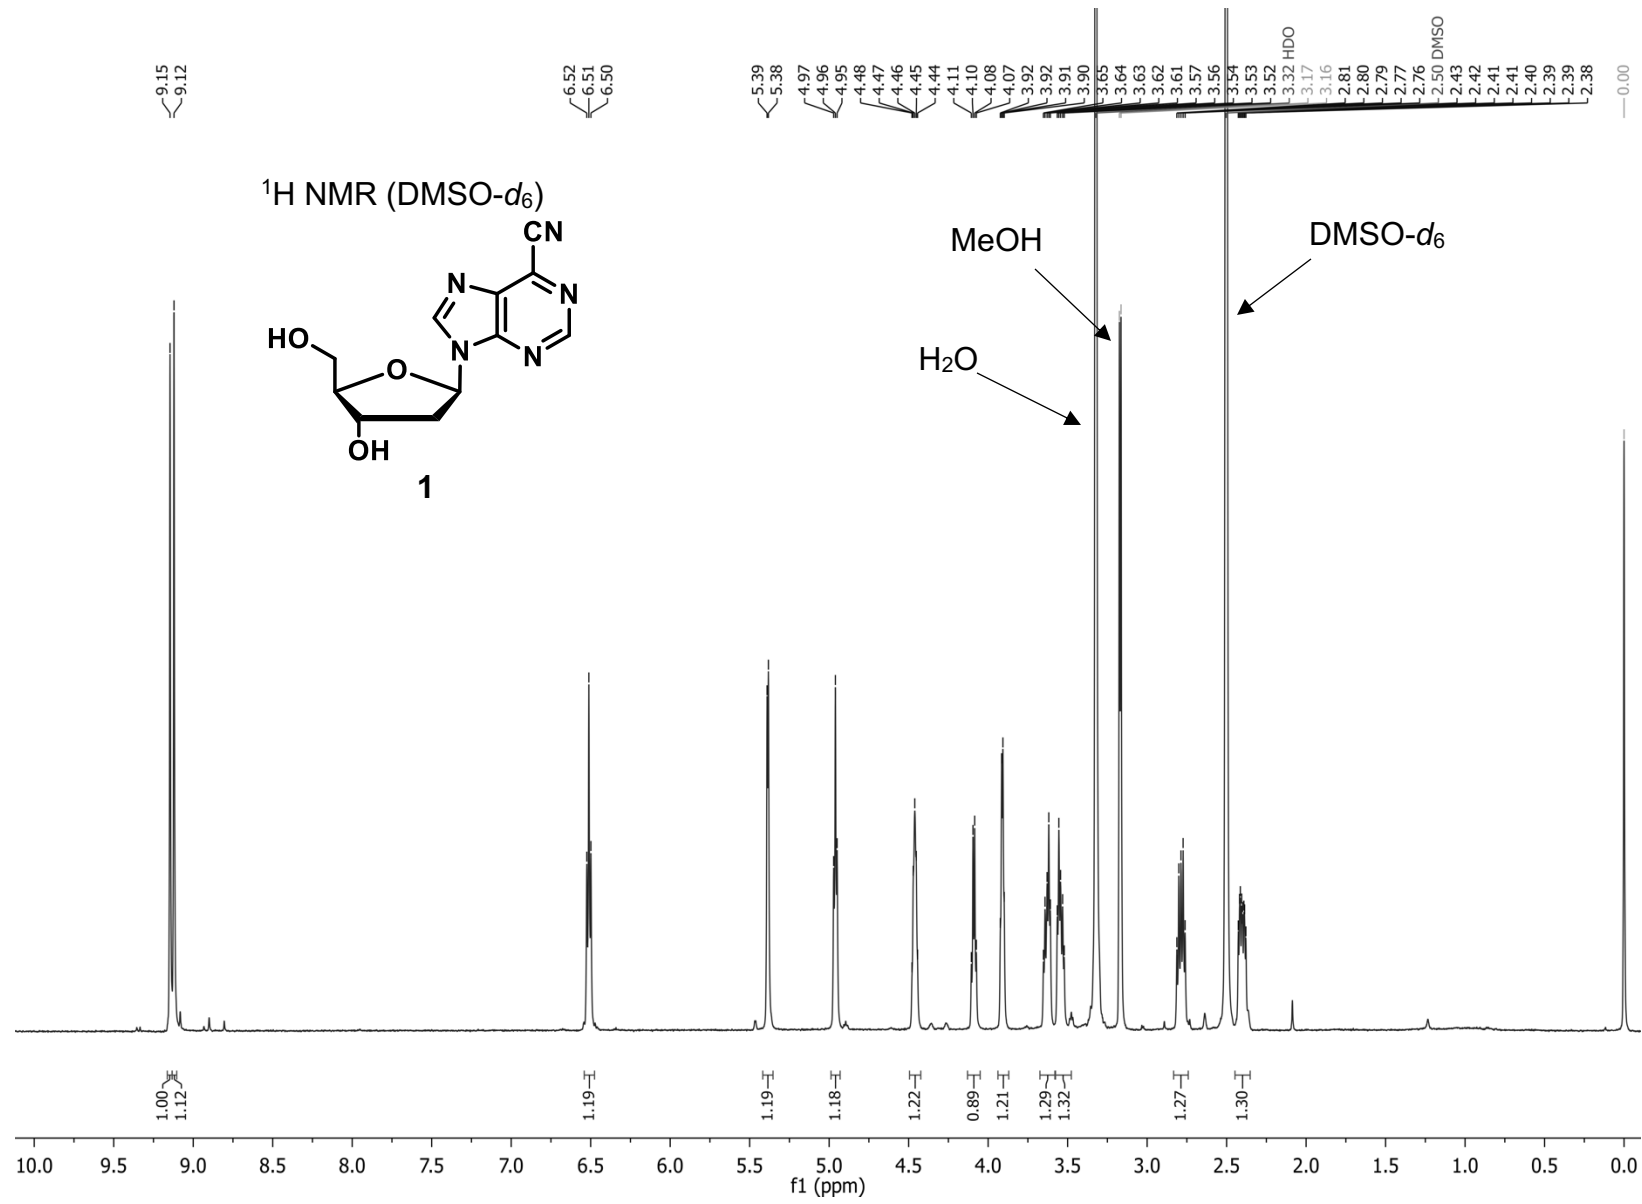

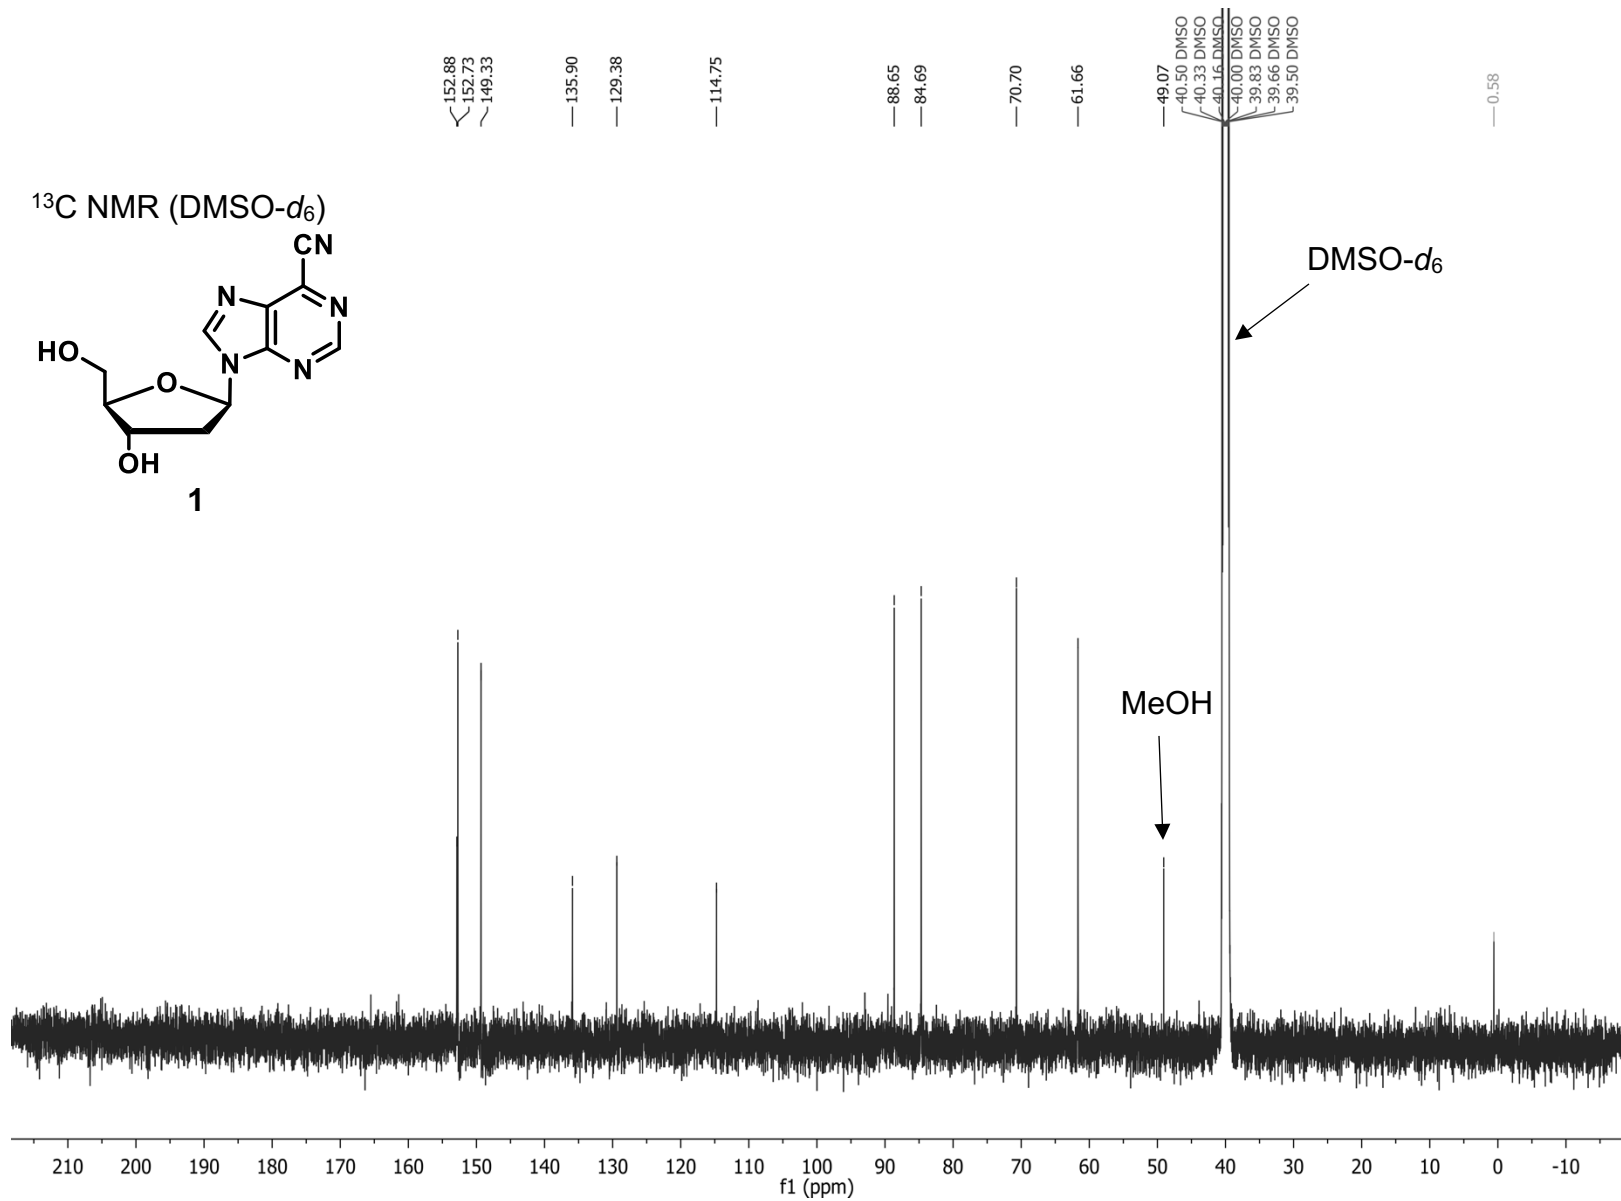

<sup>1</sup>H NMR (MeOD)

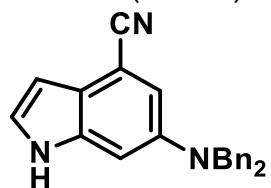

11

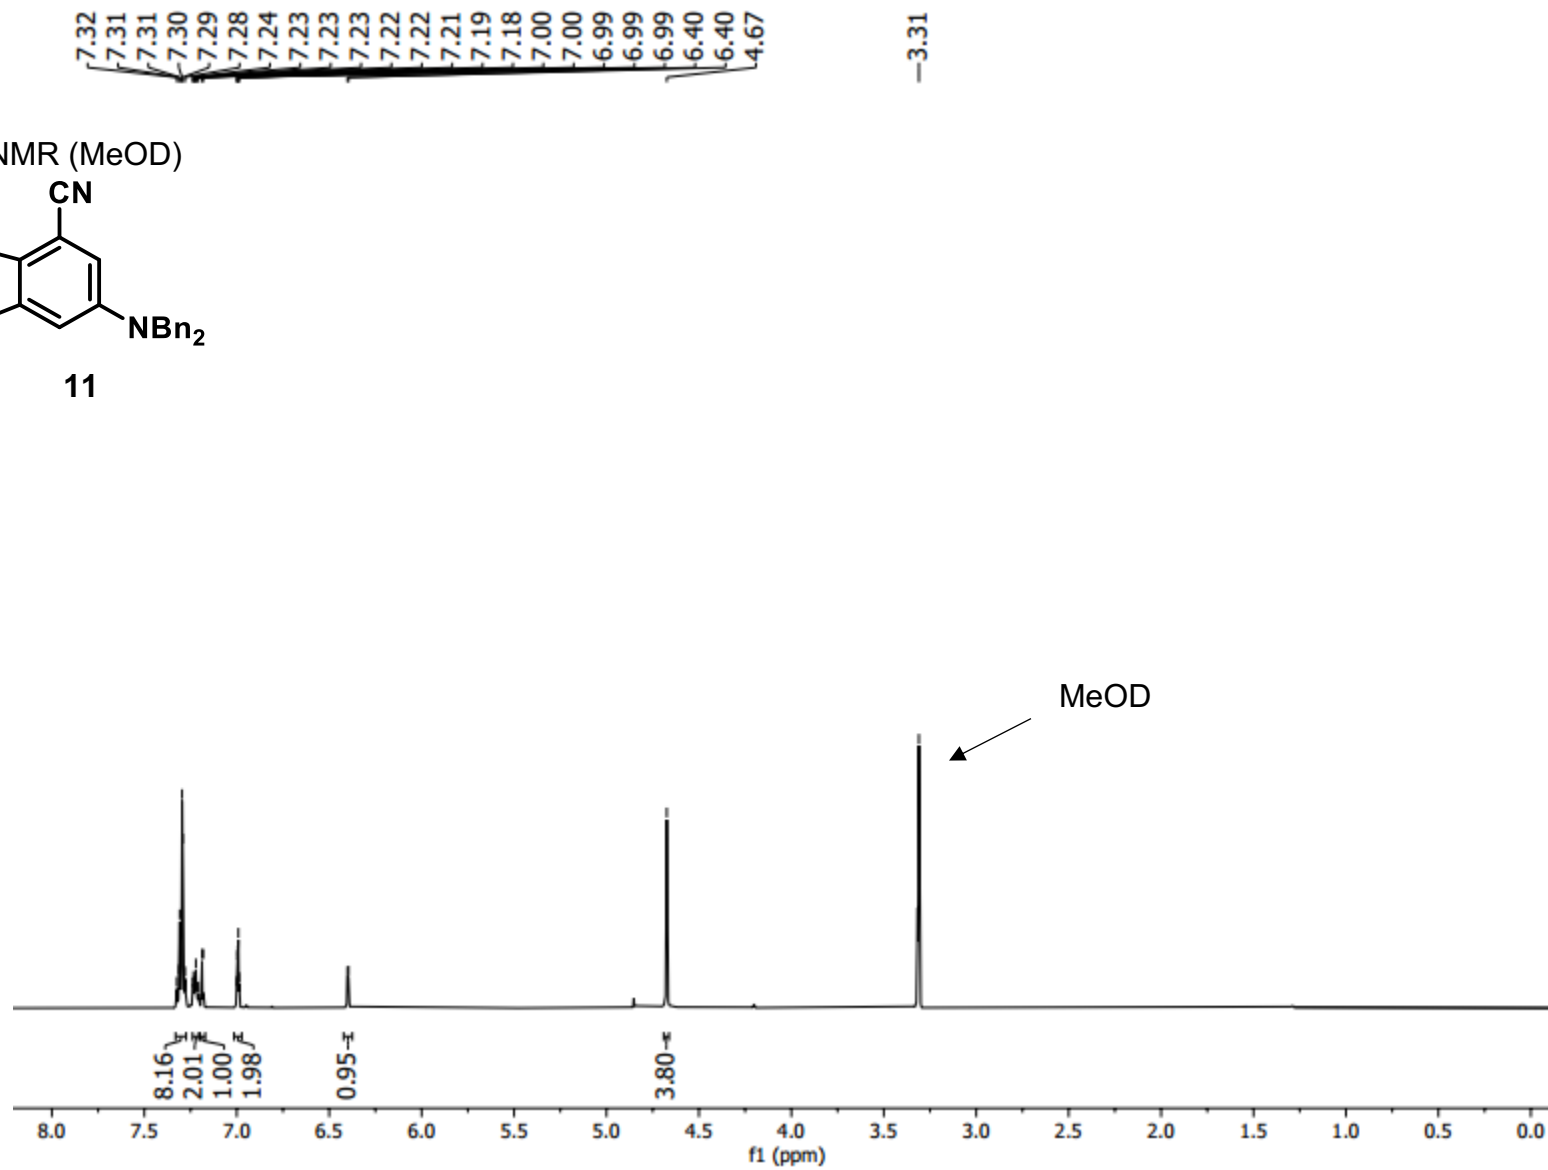



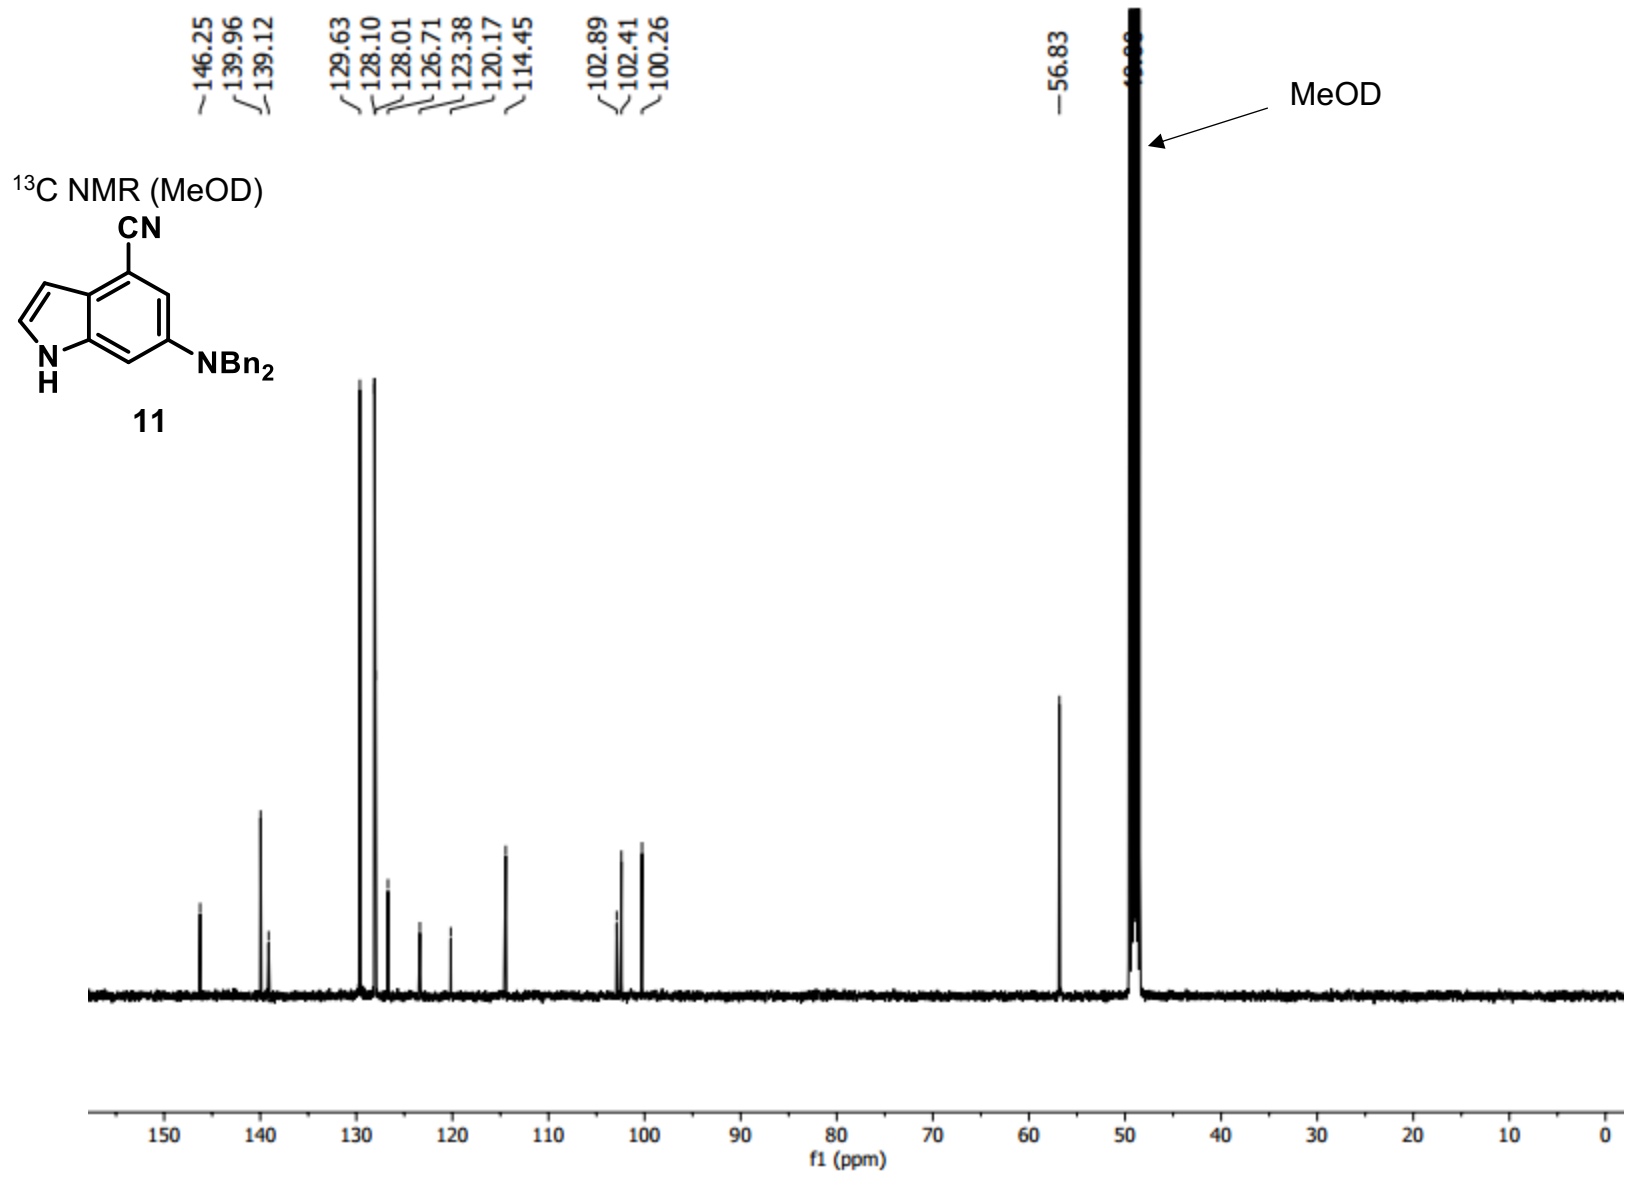

7.99  
7.98  
7.86  
7.84  
7.36  
7.35  
7.33  
7.32  
7.31  
7.30  
7.29  
7.28  
7.28  
7.27  
7.24  
7.23  
7.22  
7.22  
7.21  
7.21  
7.10  
7.10  
7.04  
7.04  
6.46  
6.45  
6.29  
6.28  
6.27  
6.26  
5.58  
5.57  
5.57  
5.56  
4.72  
4.51  
4.49  
4.49  
4.47  
4.46  
4.46  
4.45  
4.45  
4.44  
4.42  
2.68  
2.55  
2.43  
2.39  
1.94

<sup>1</sup>H NMR (MeCN-*d*<sub>3</sub>)

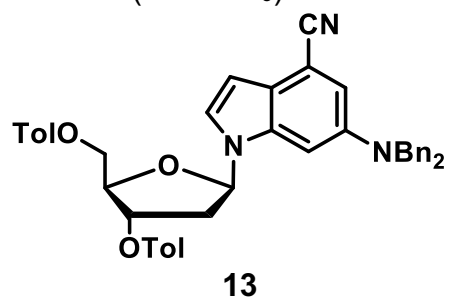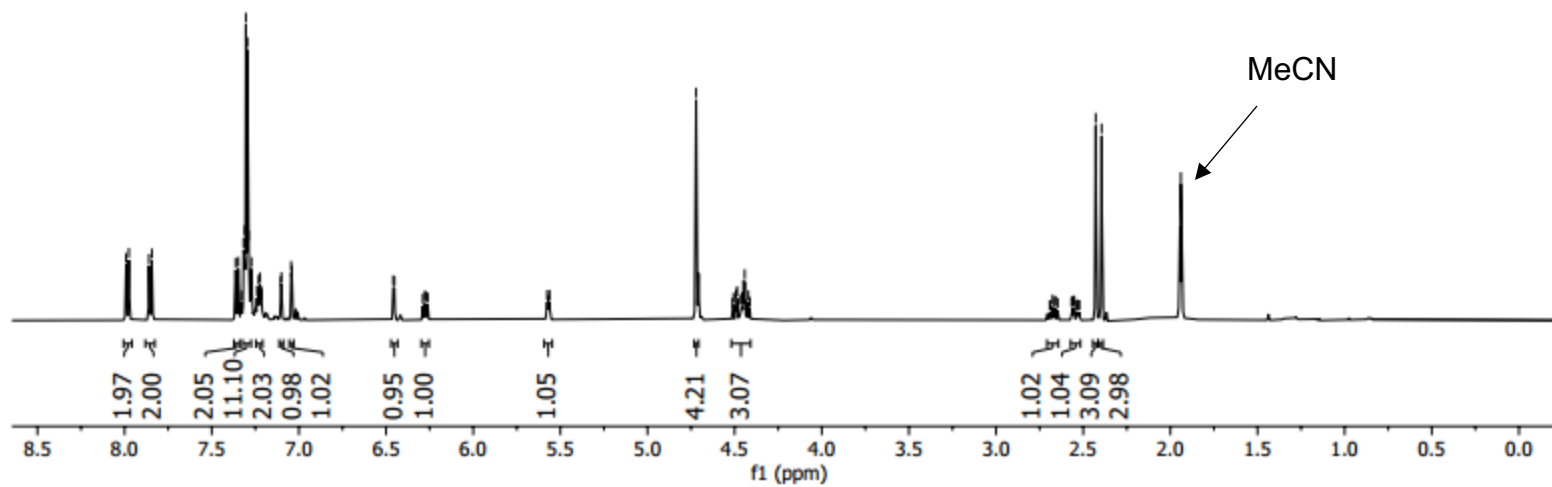

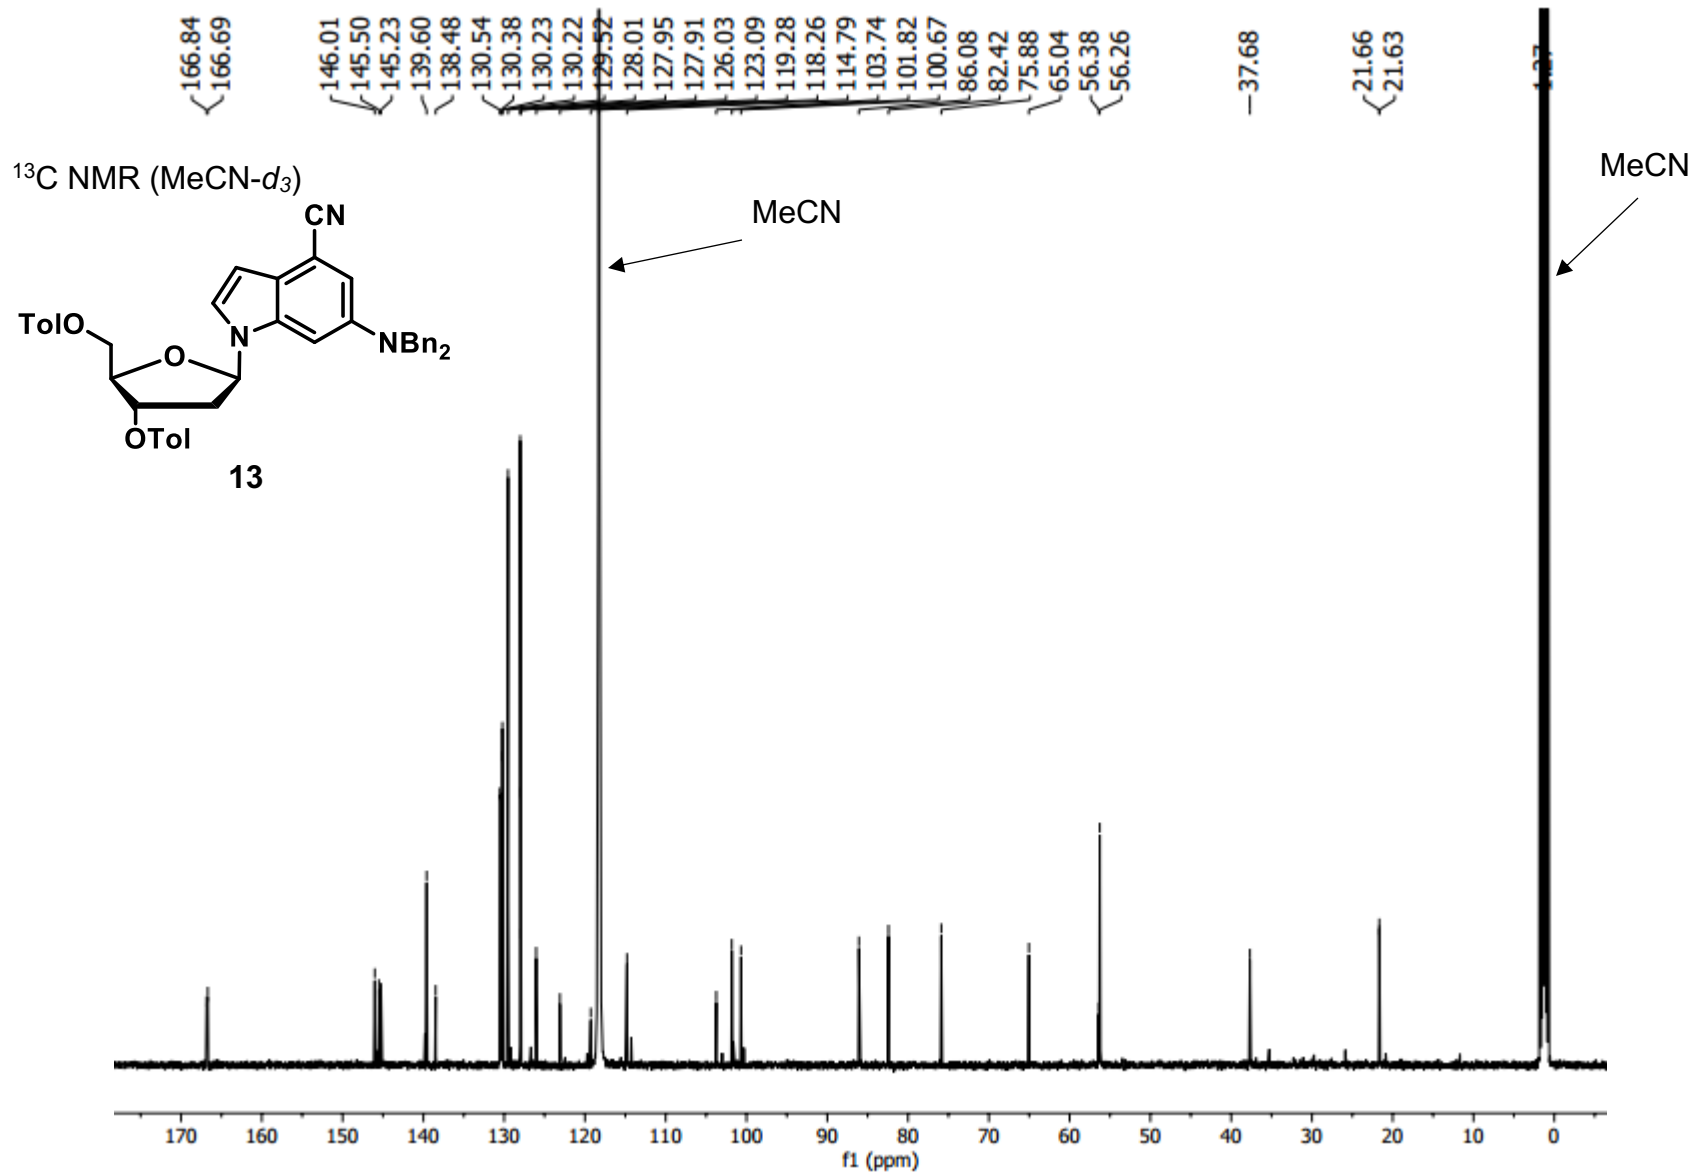

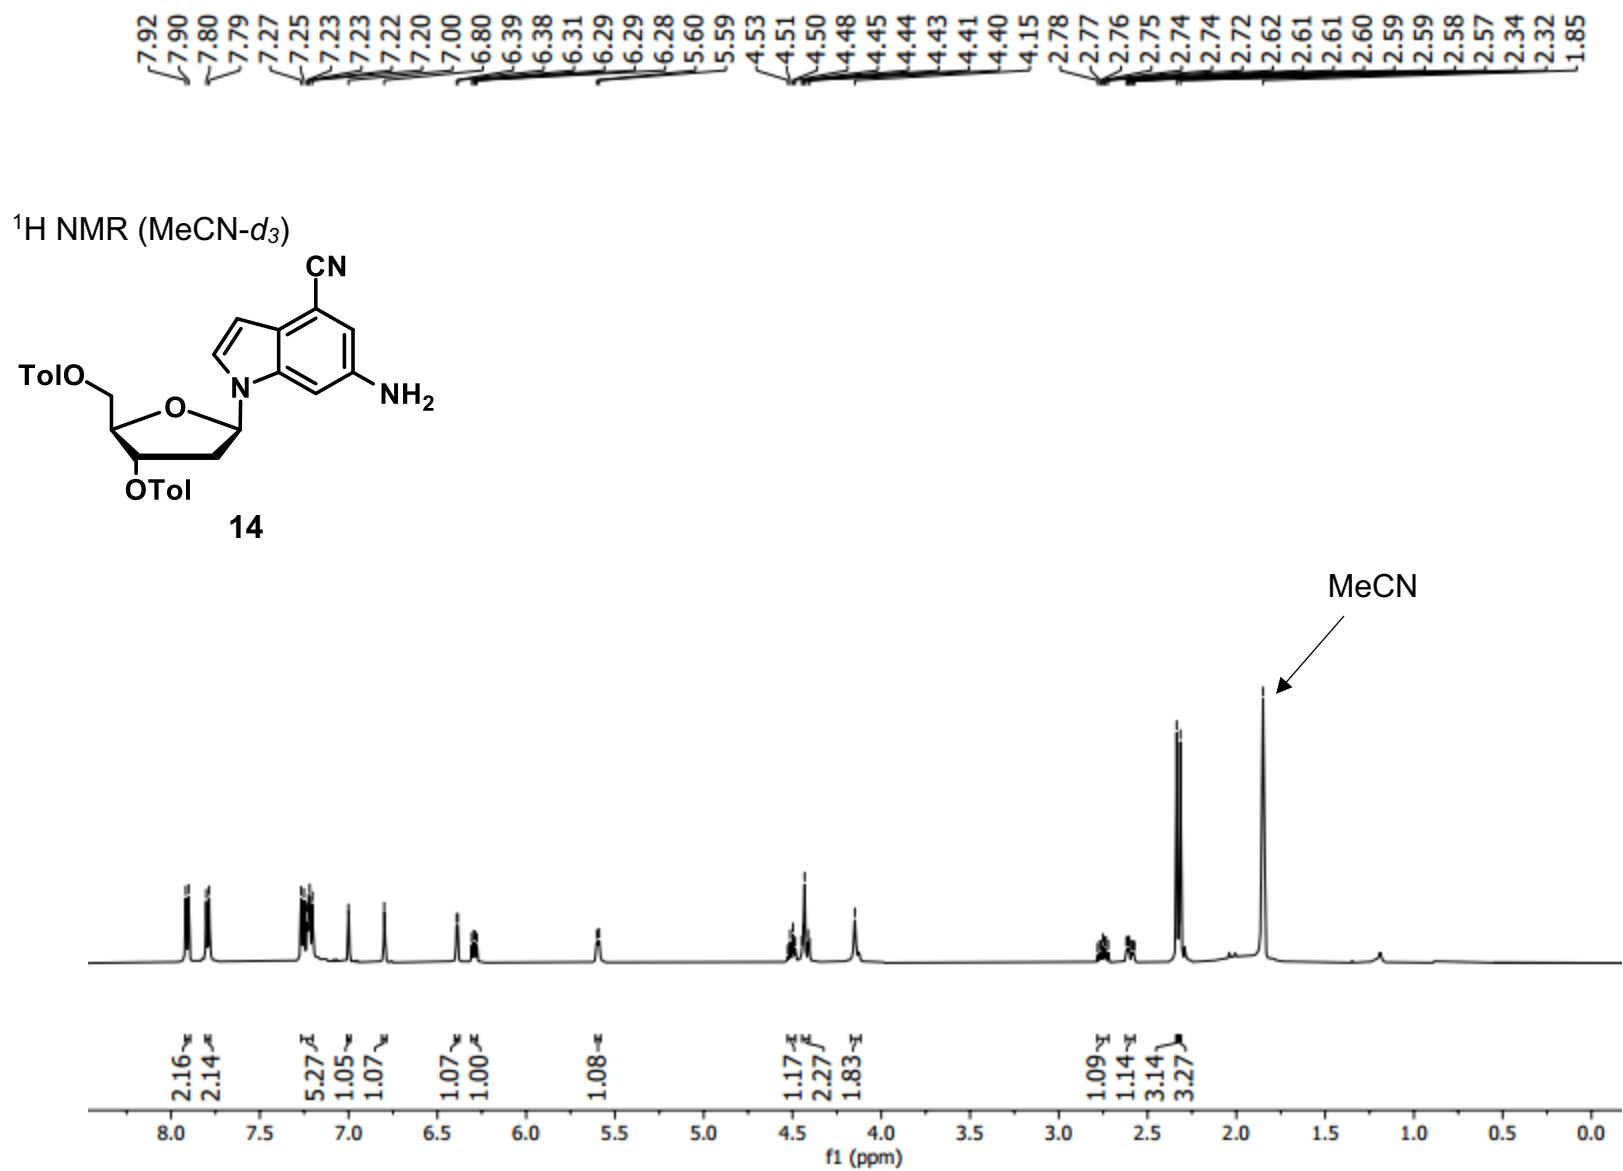

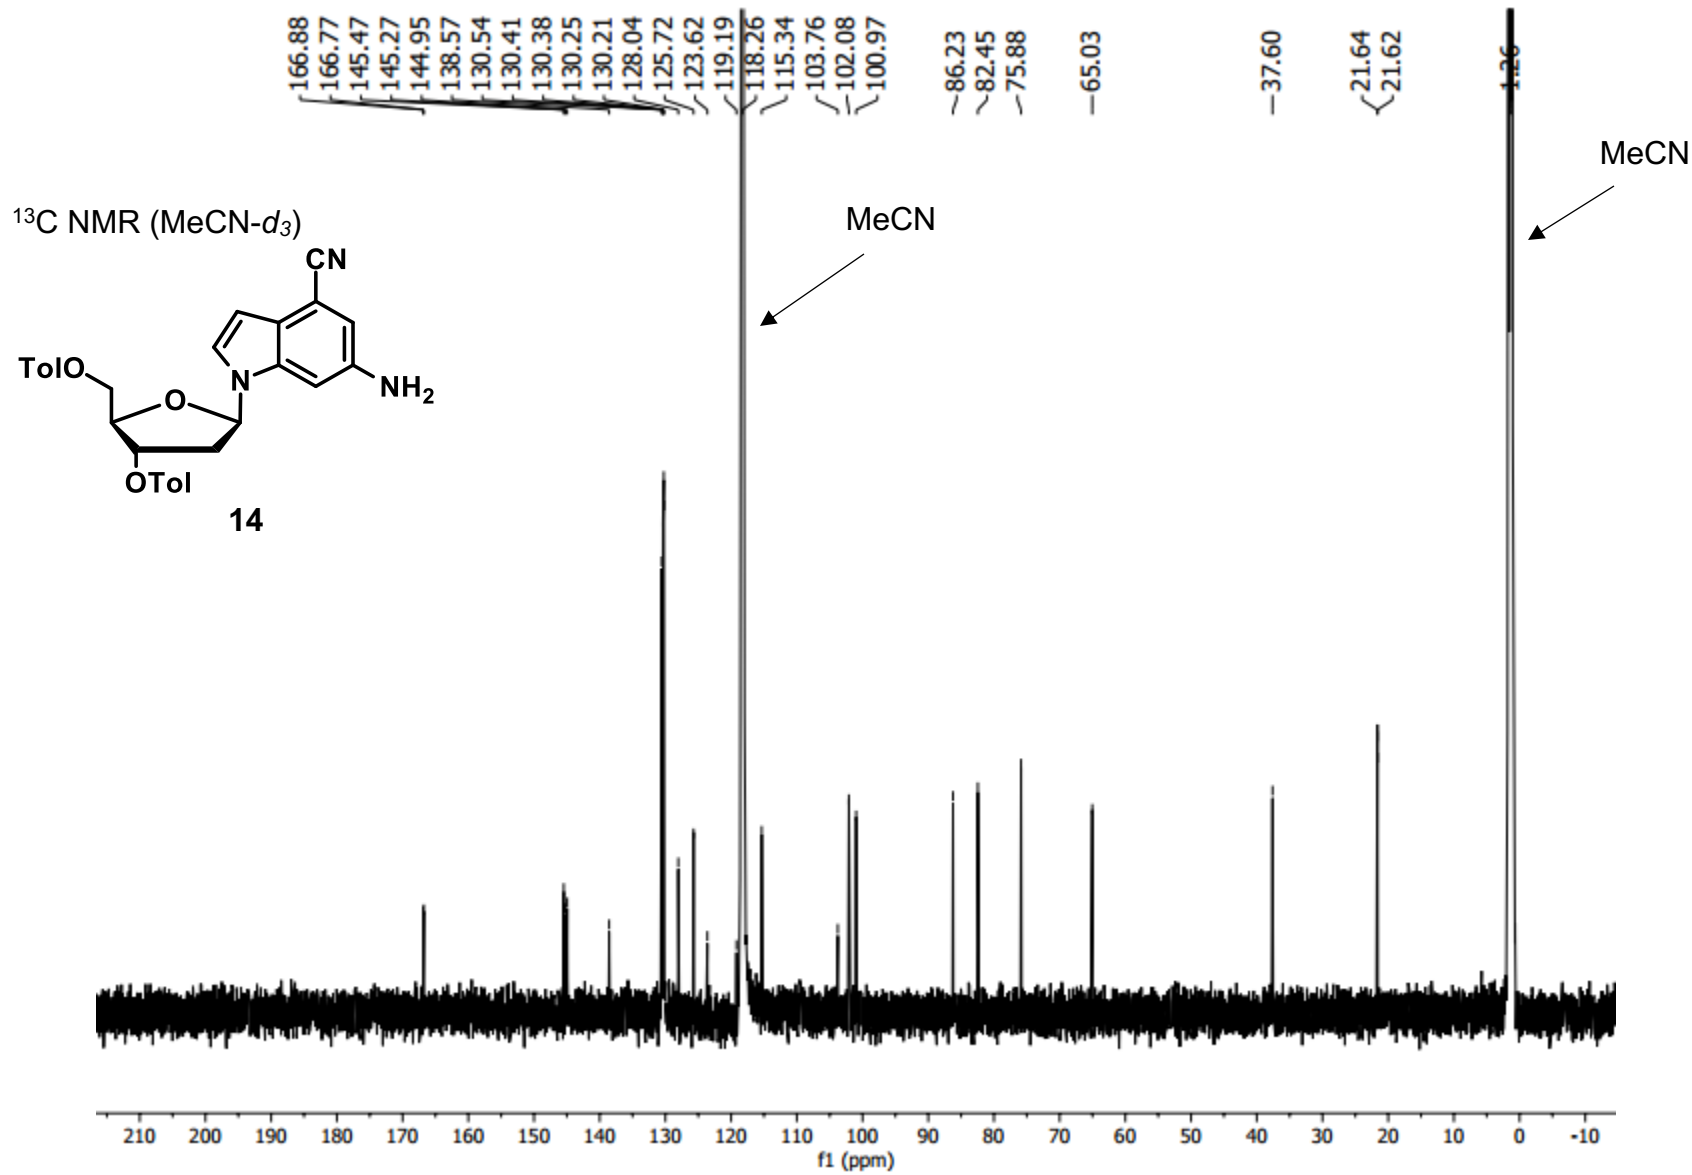

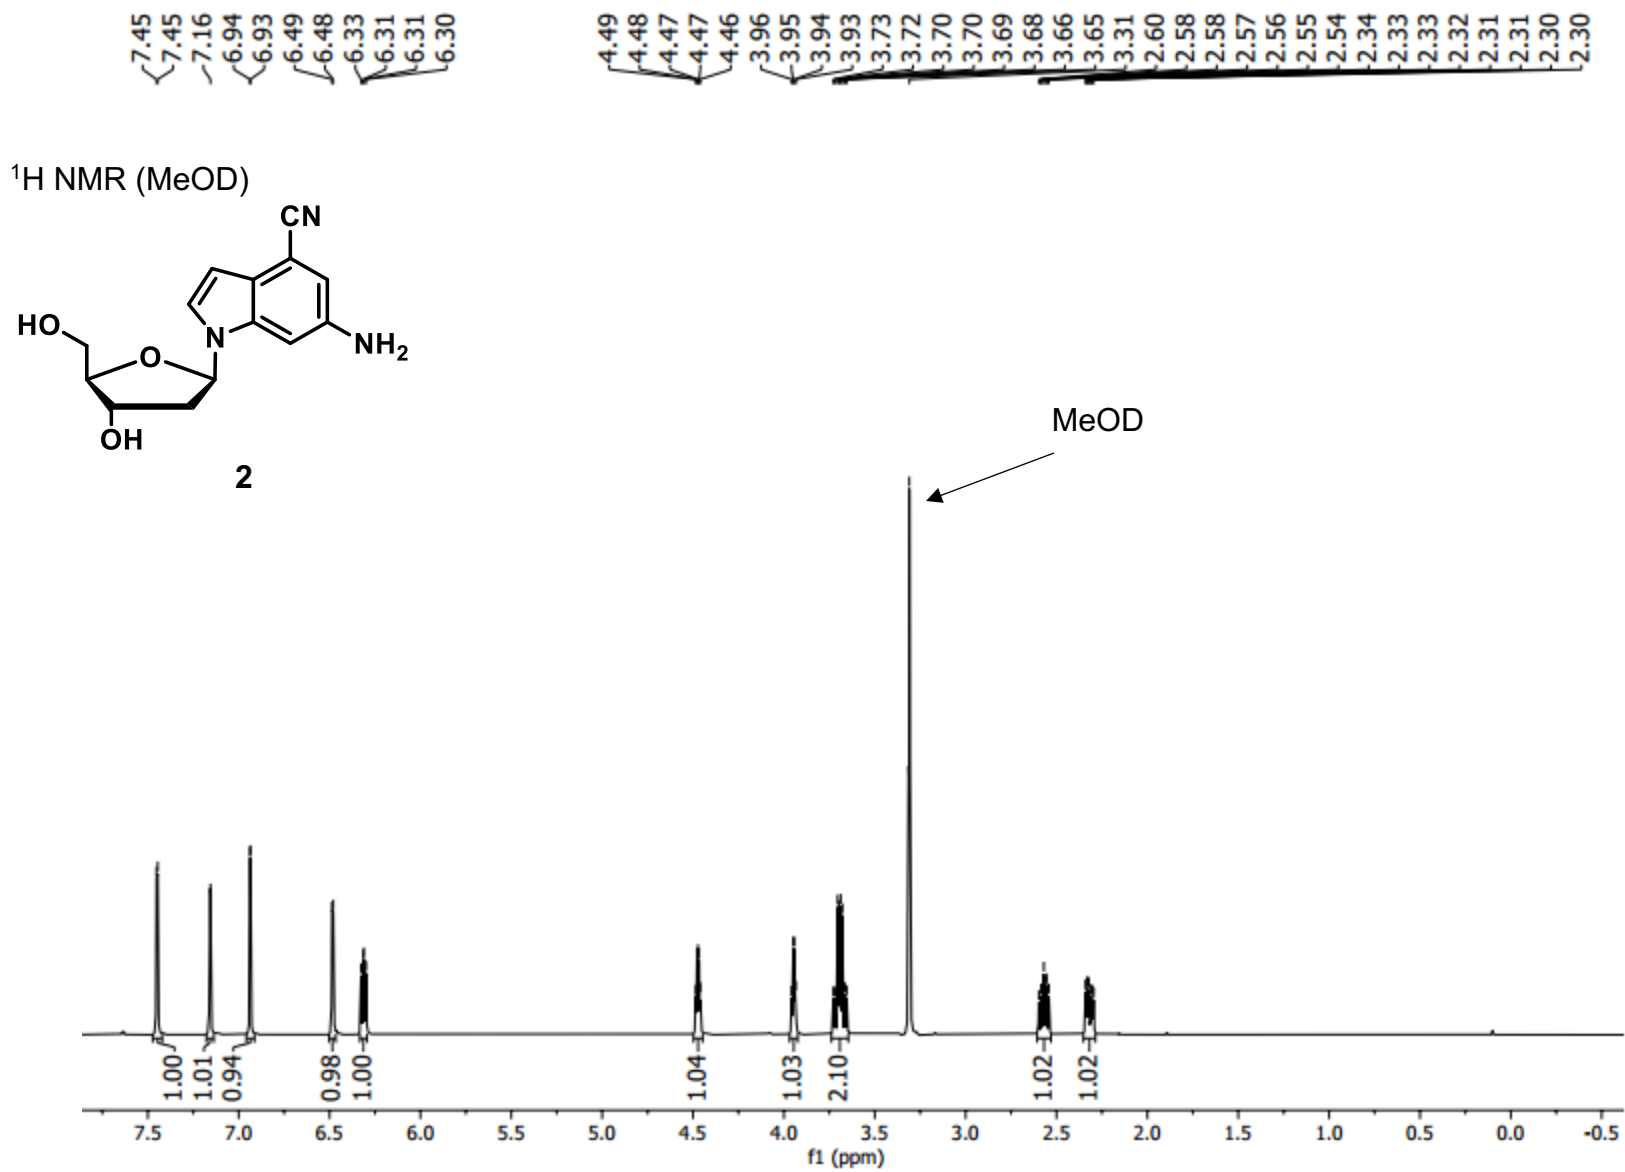

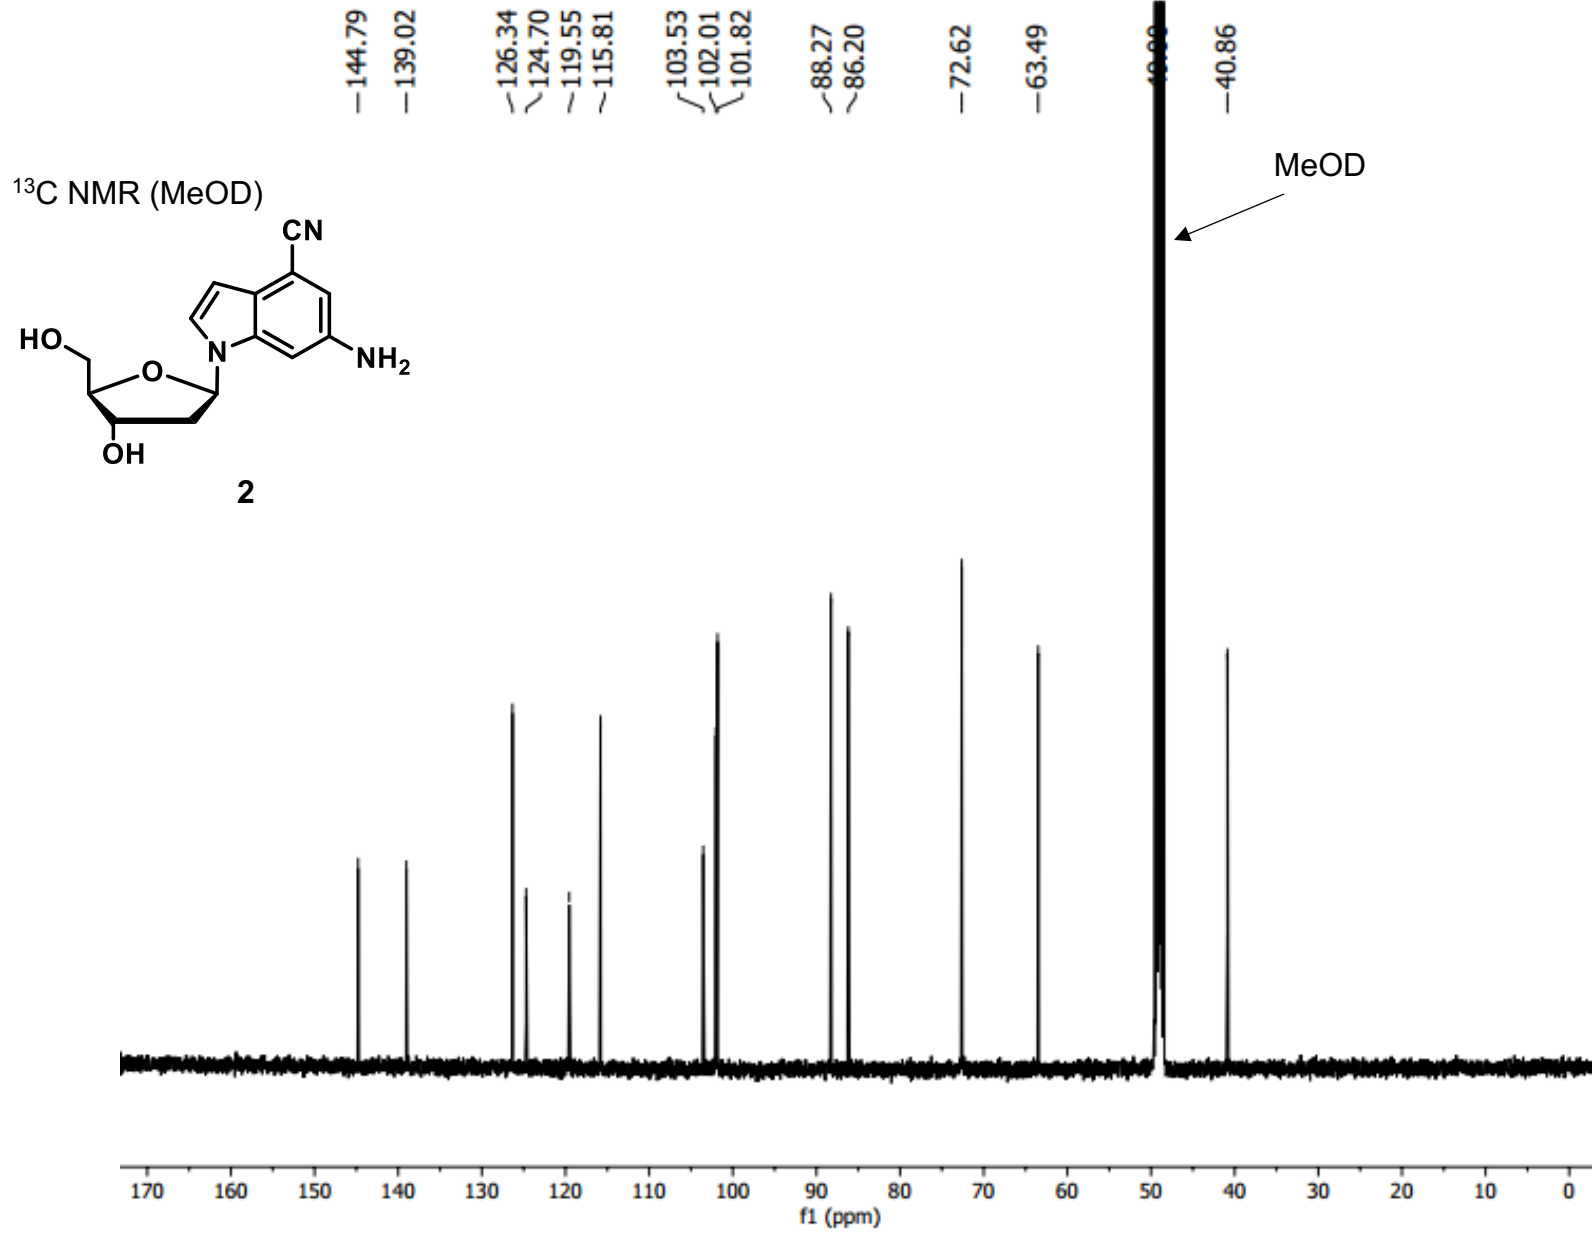

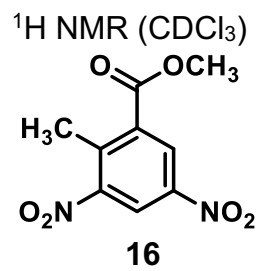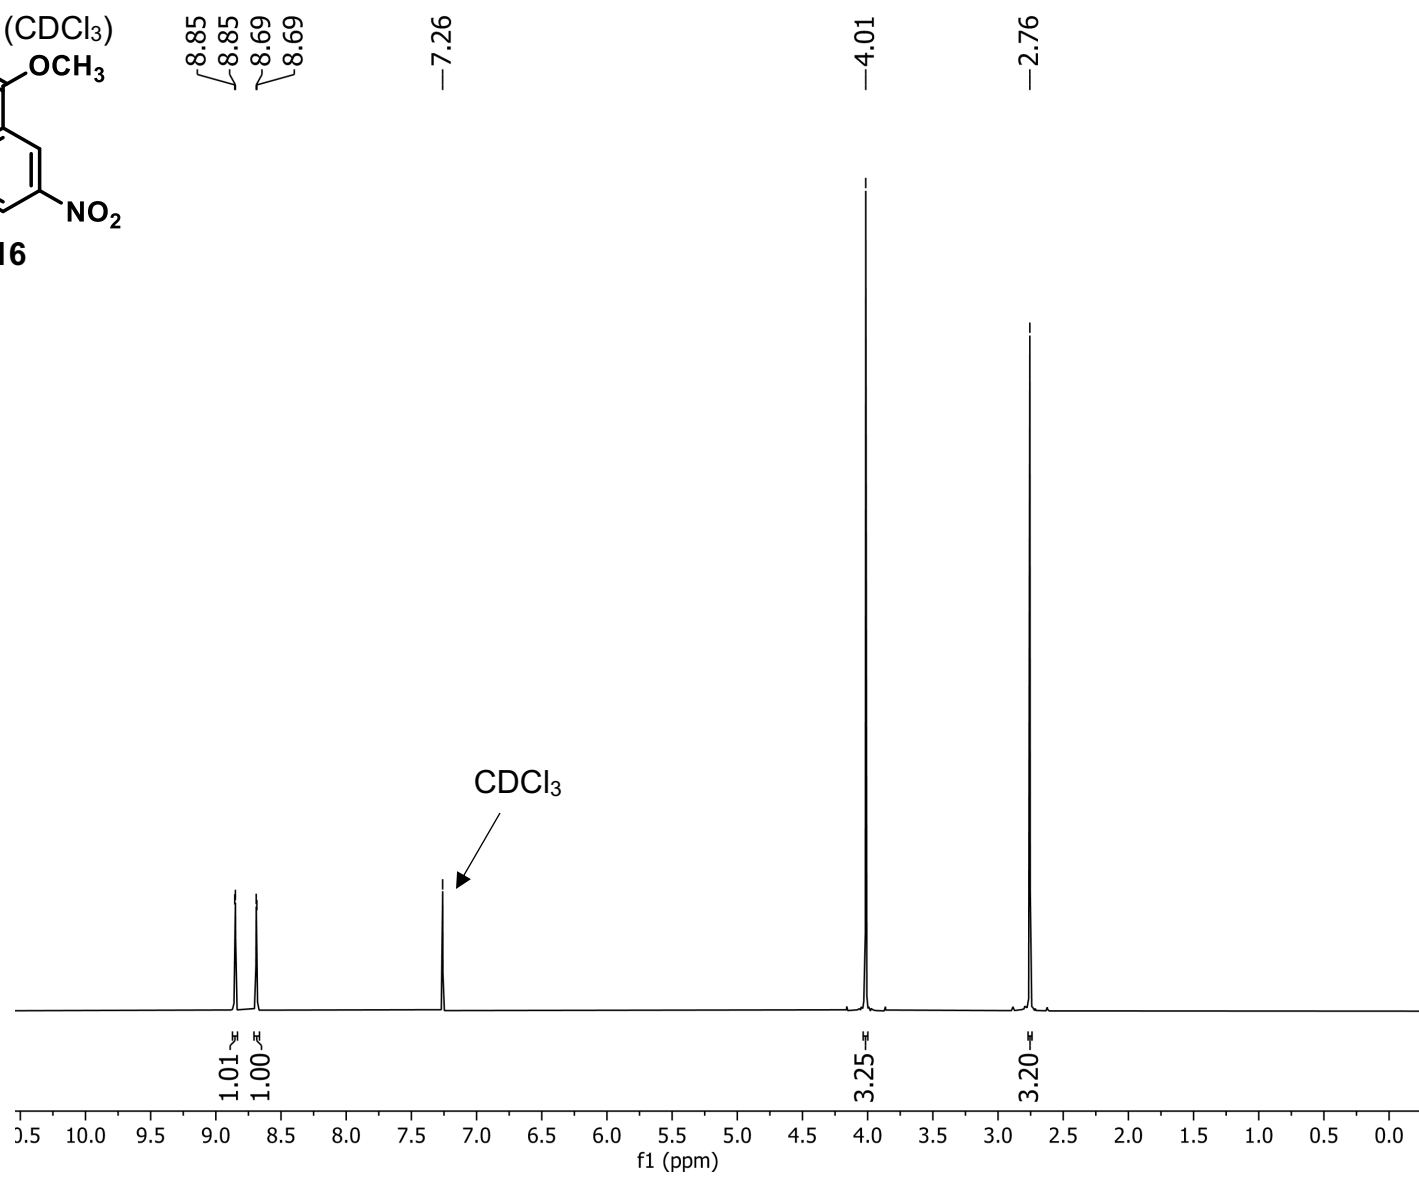



<sup>1</sup>H NMR (MeOD)

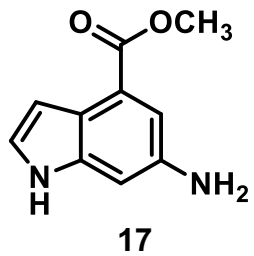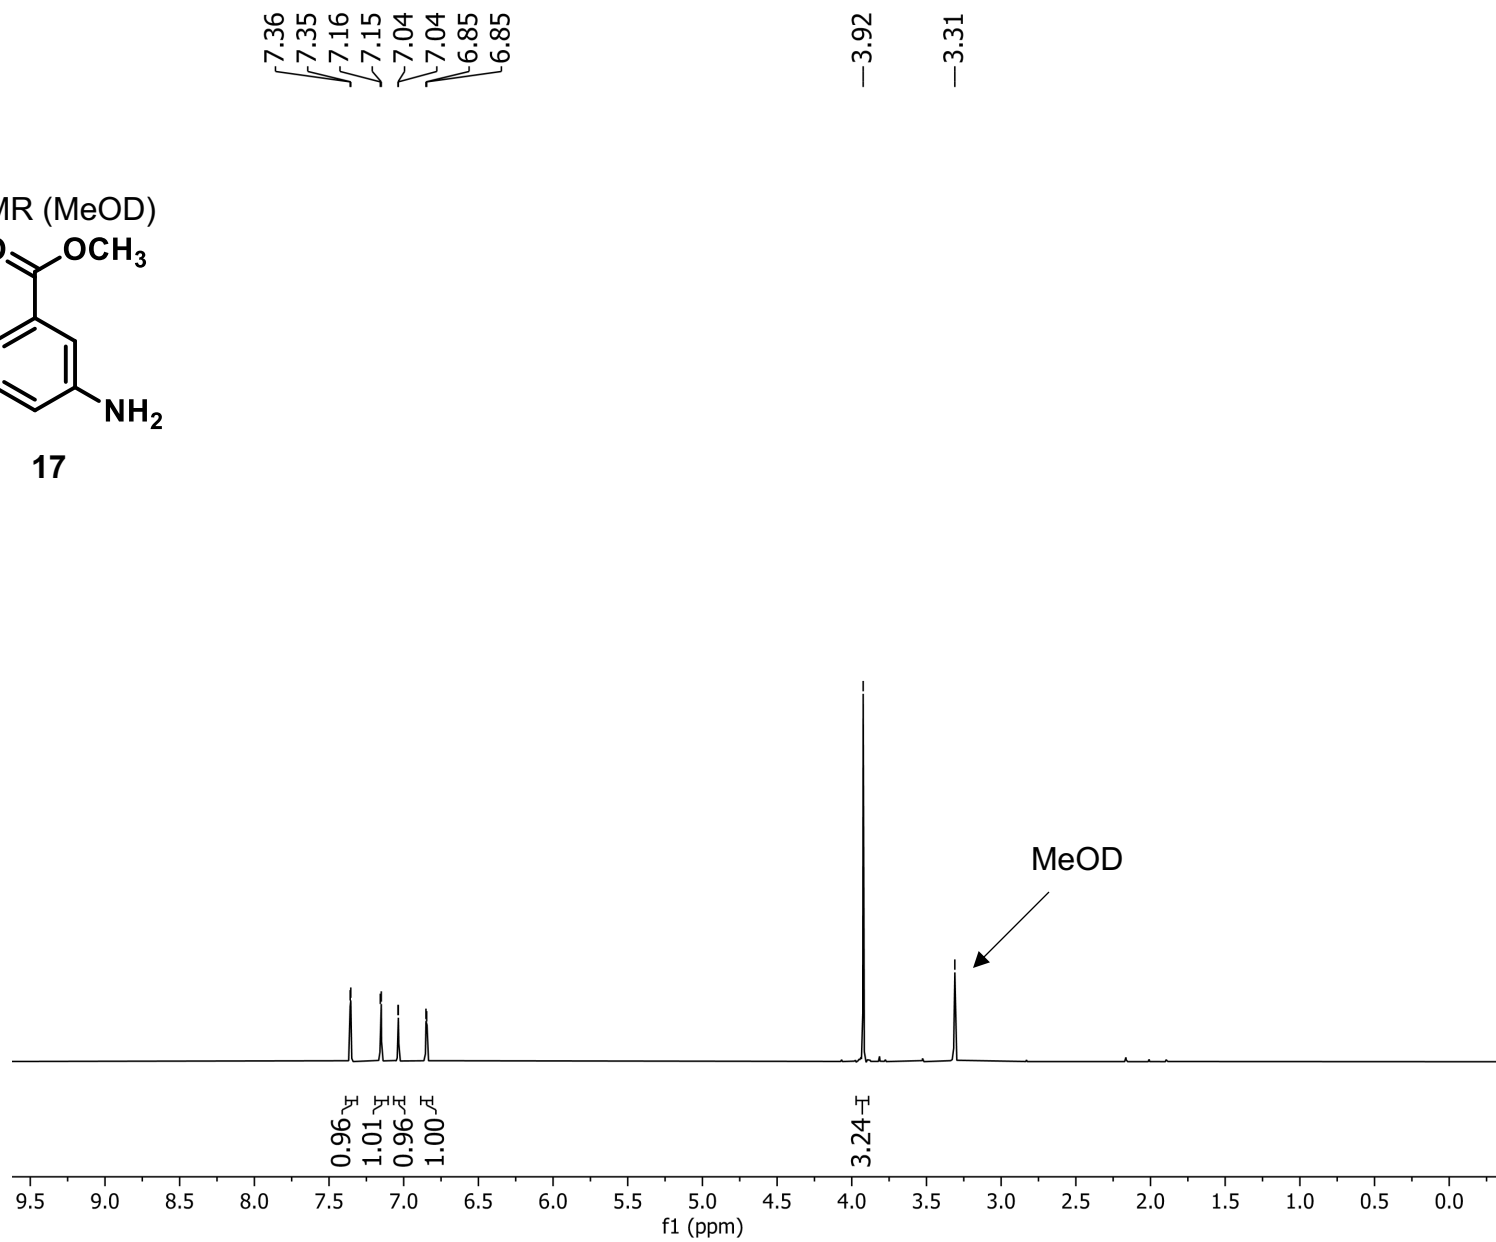

<sup>1</sup>H NMR (DMSO-*d*<sub>6</sub>)

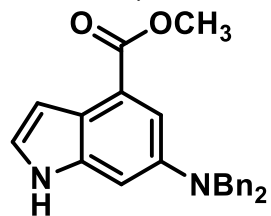

18

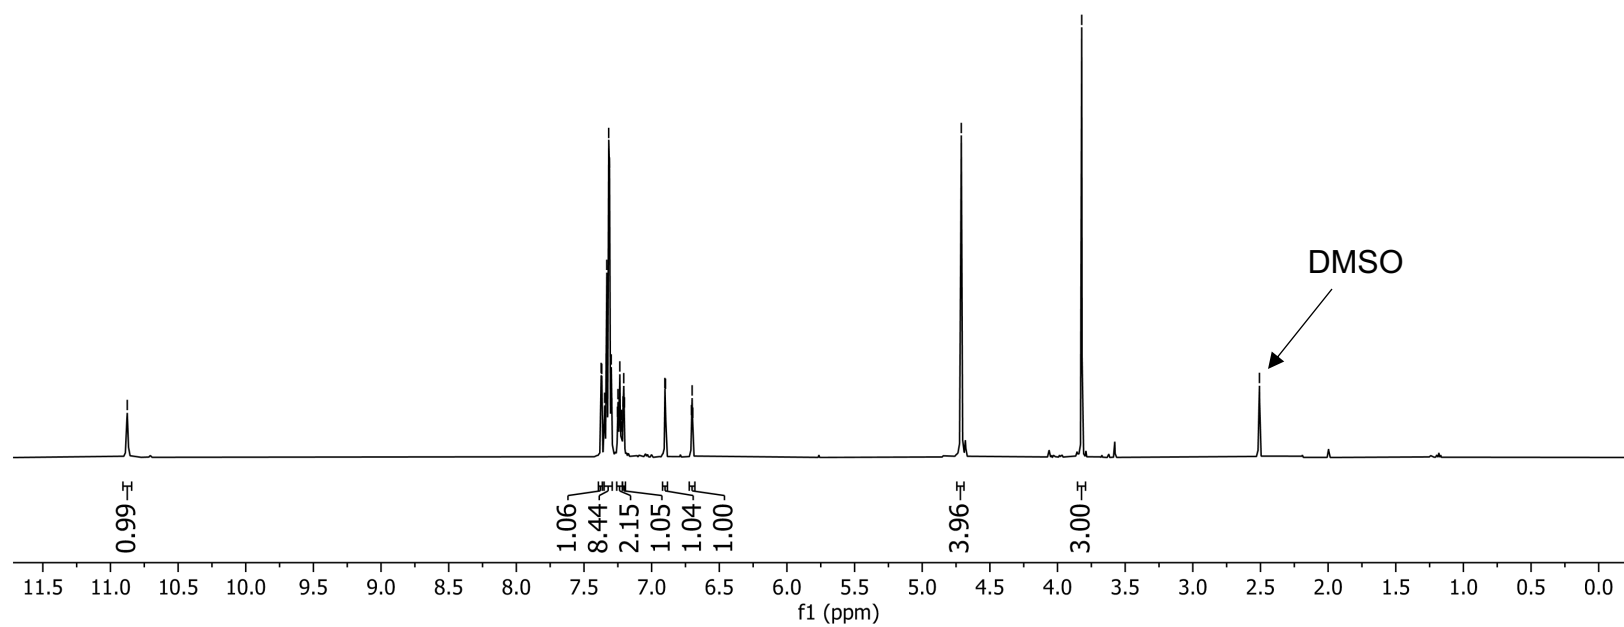

10.88  
7.37  
7.37  
7.35  
7.34  
7.34  
7.33  
7.32  
7.31  
7.30  
7.29  
7.25  
7.25  
7.24  
7.24  
7.24  
7.23  
7.23  
7.22  
7.22  
7.21  
7.21  
7.20  
6.90  
6.90  
6.71  
6.70  
6.70  
-4.71  
-3.82  
-2.51

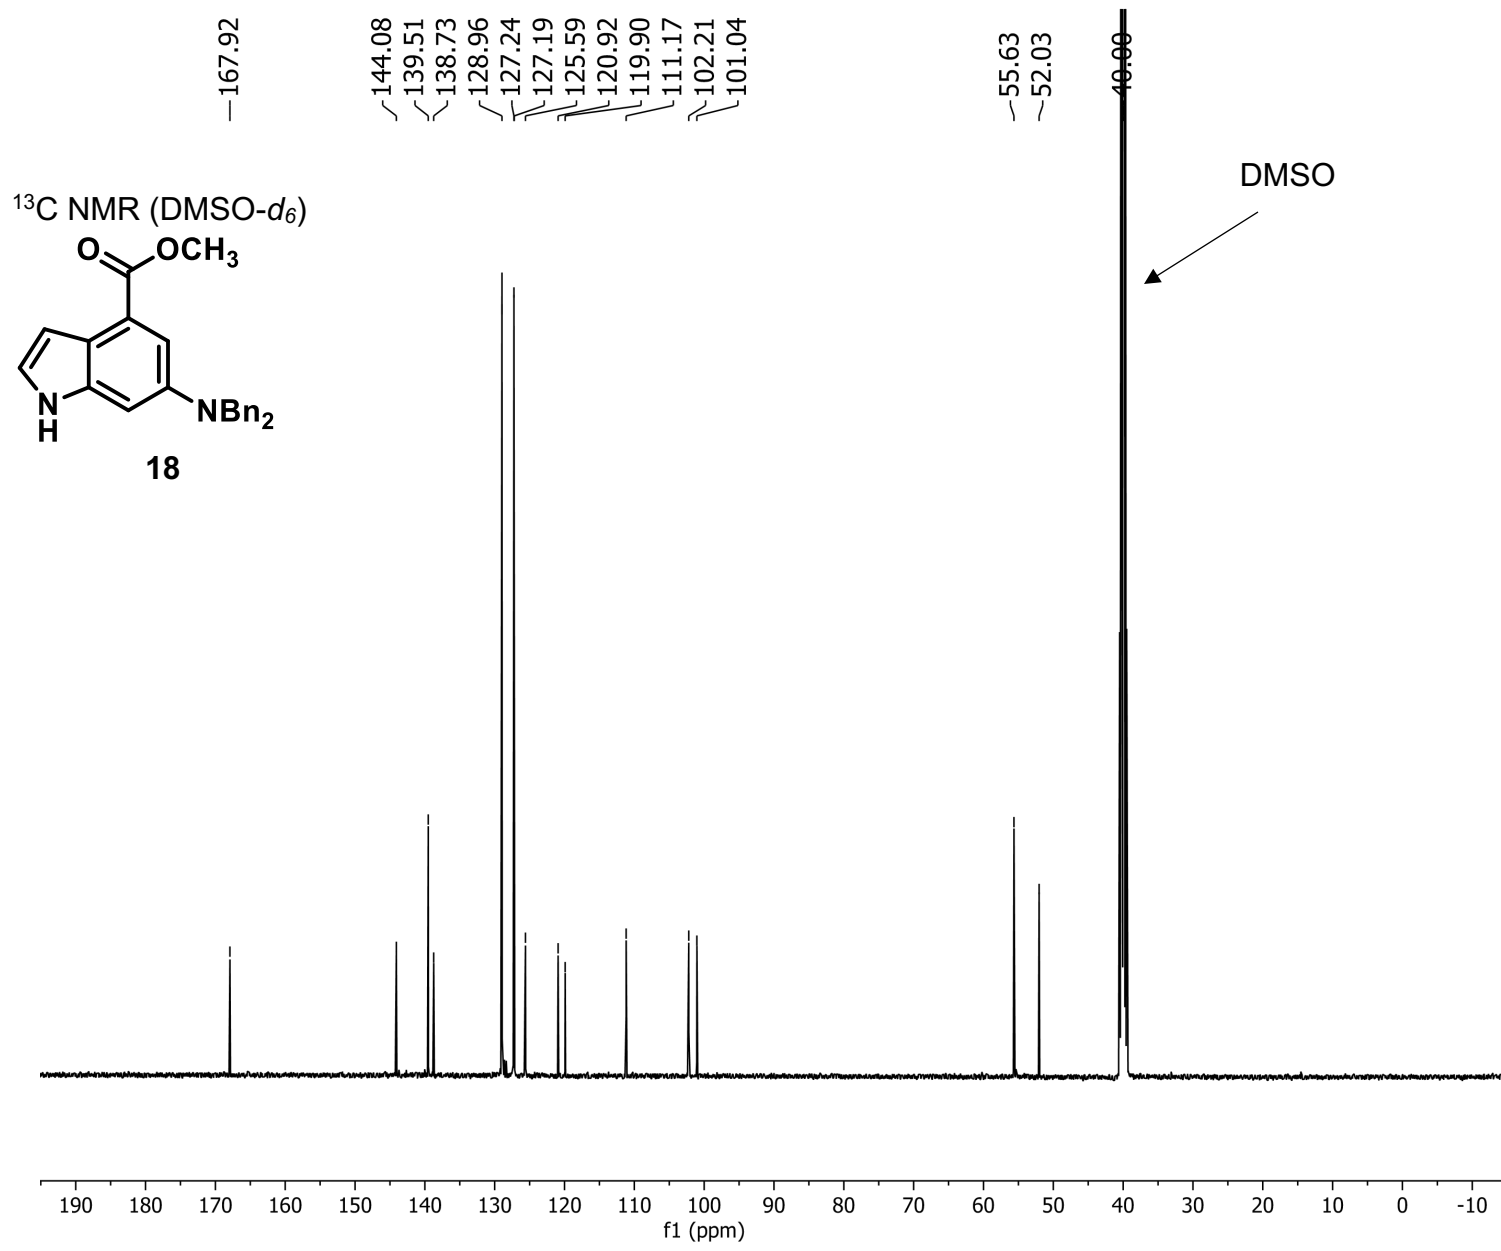

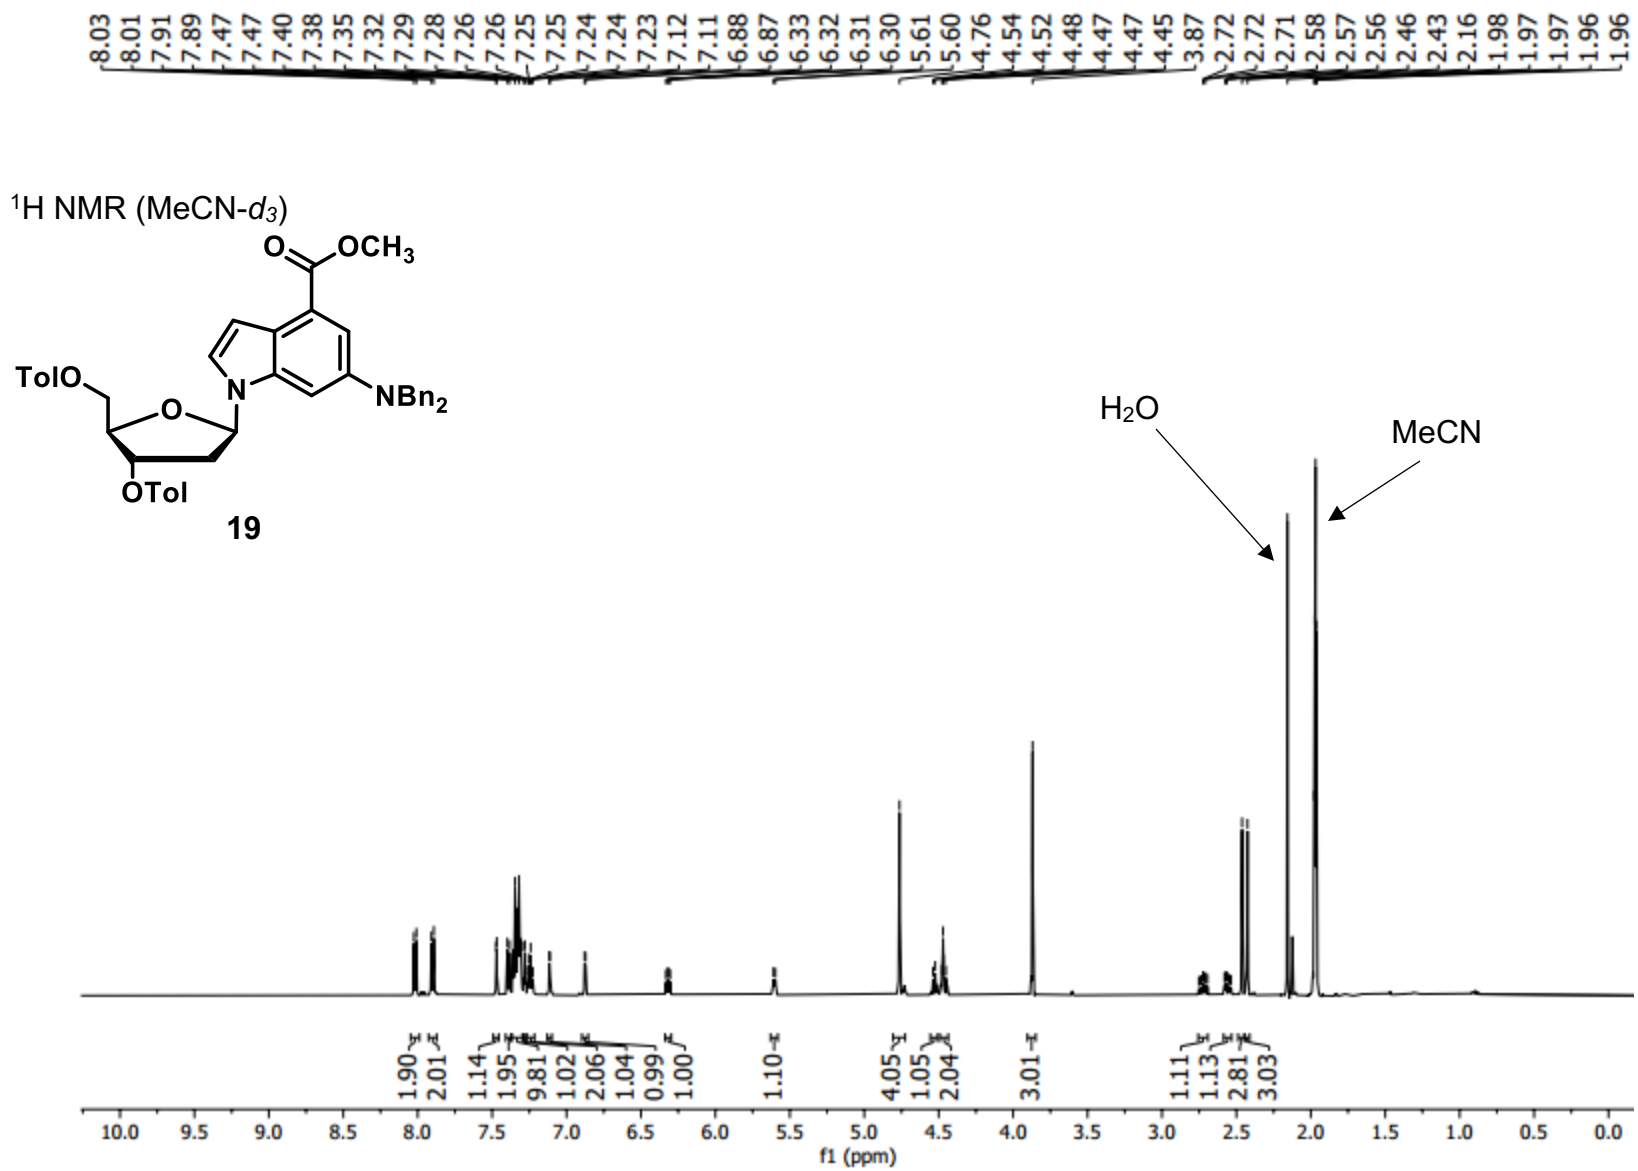

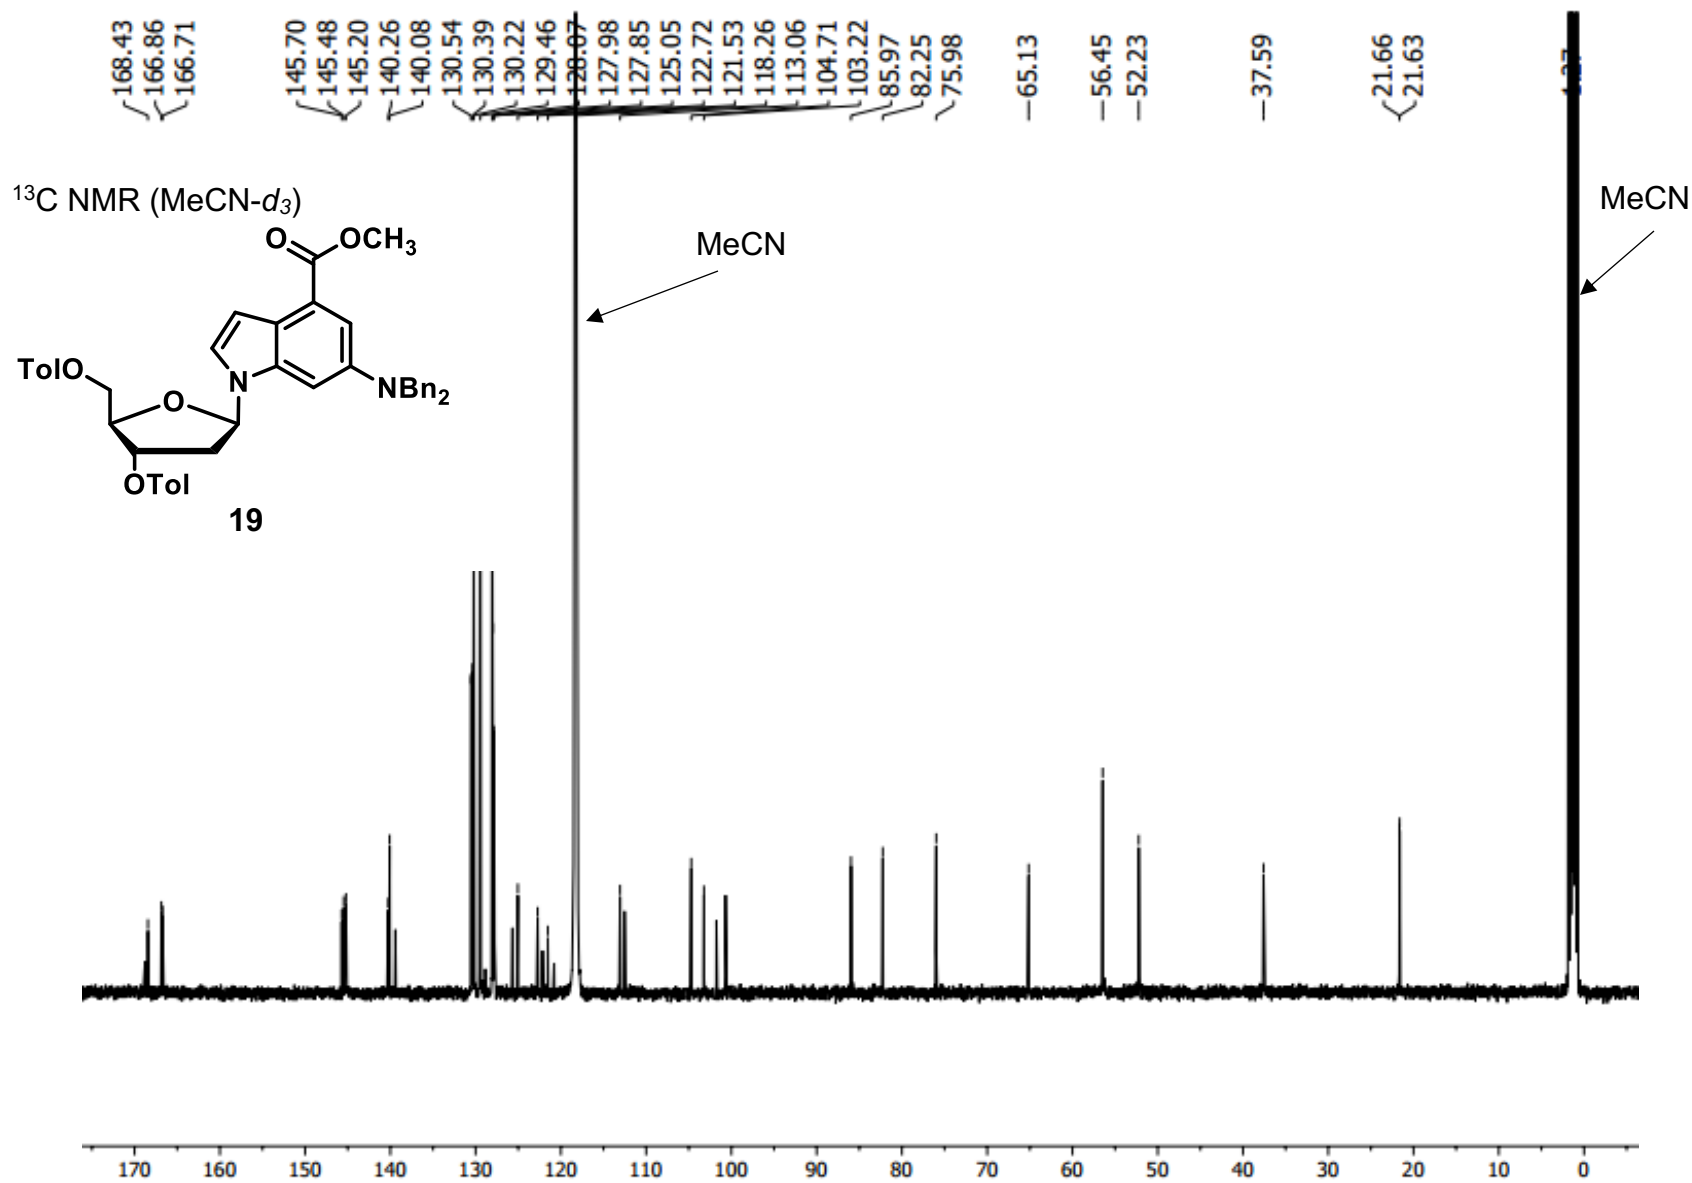

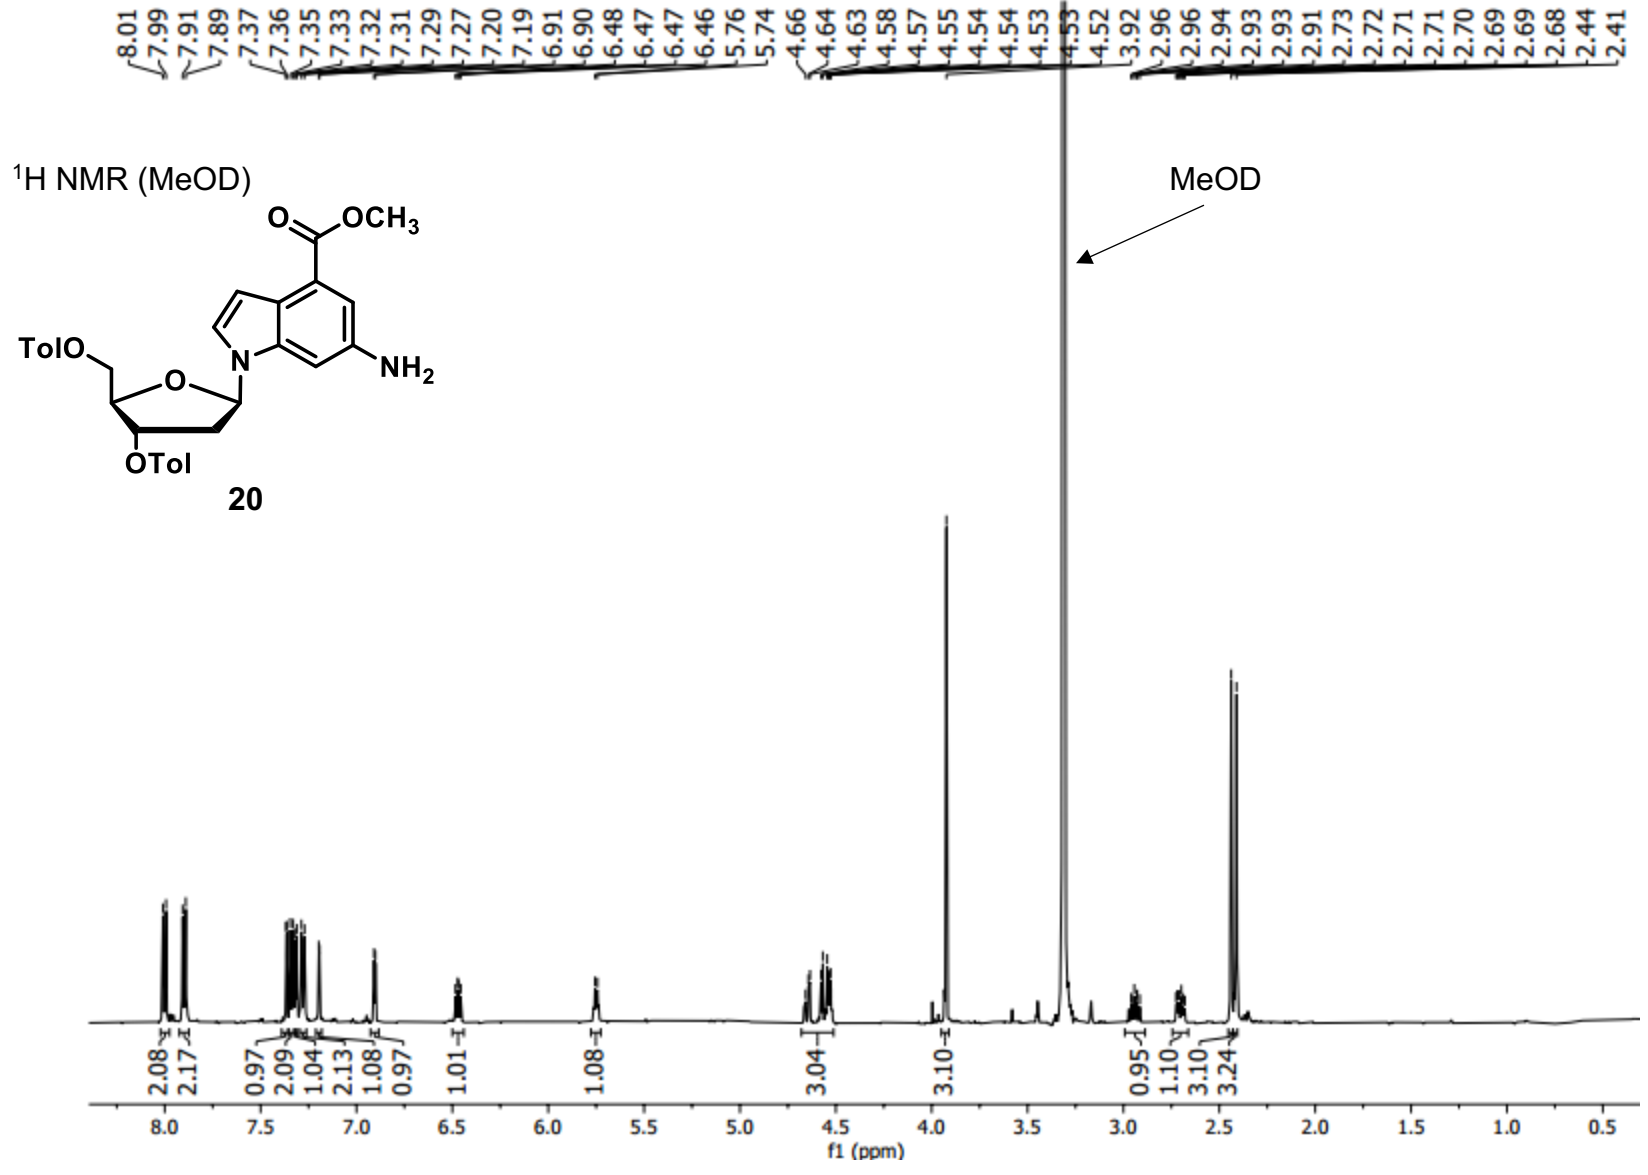

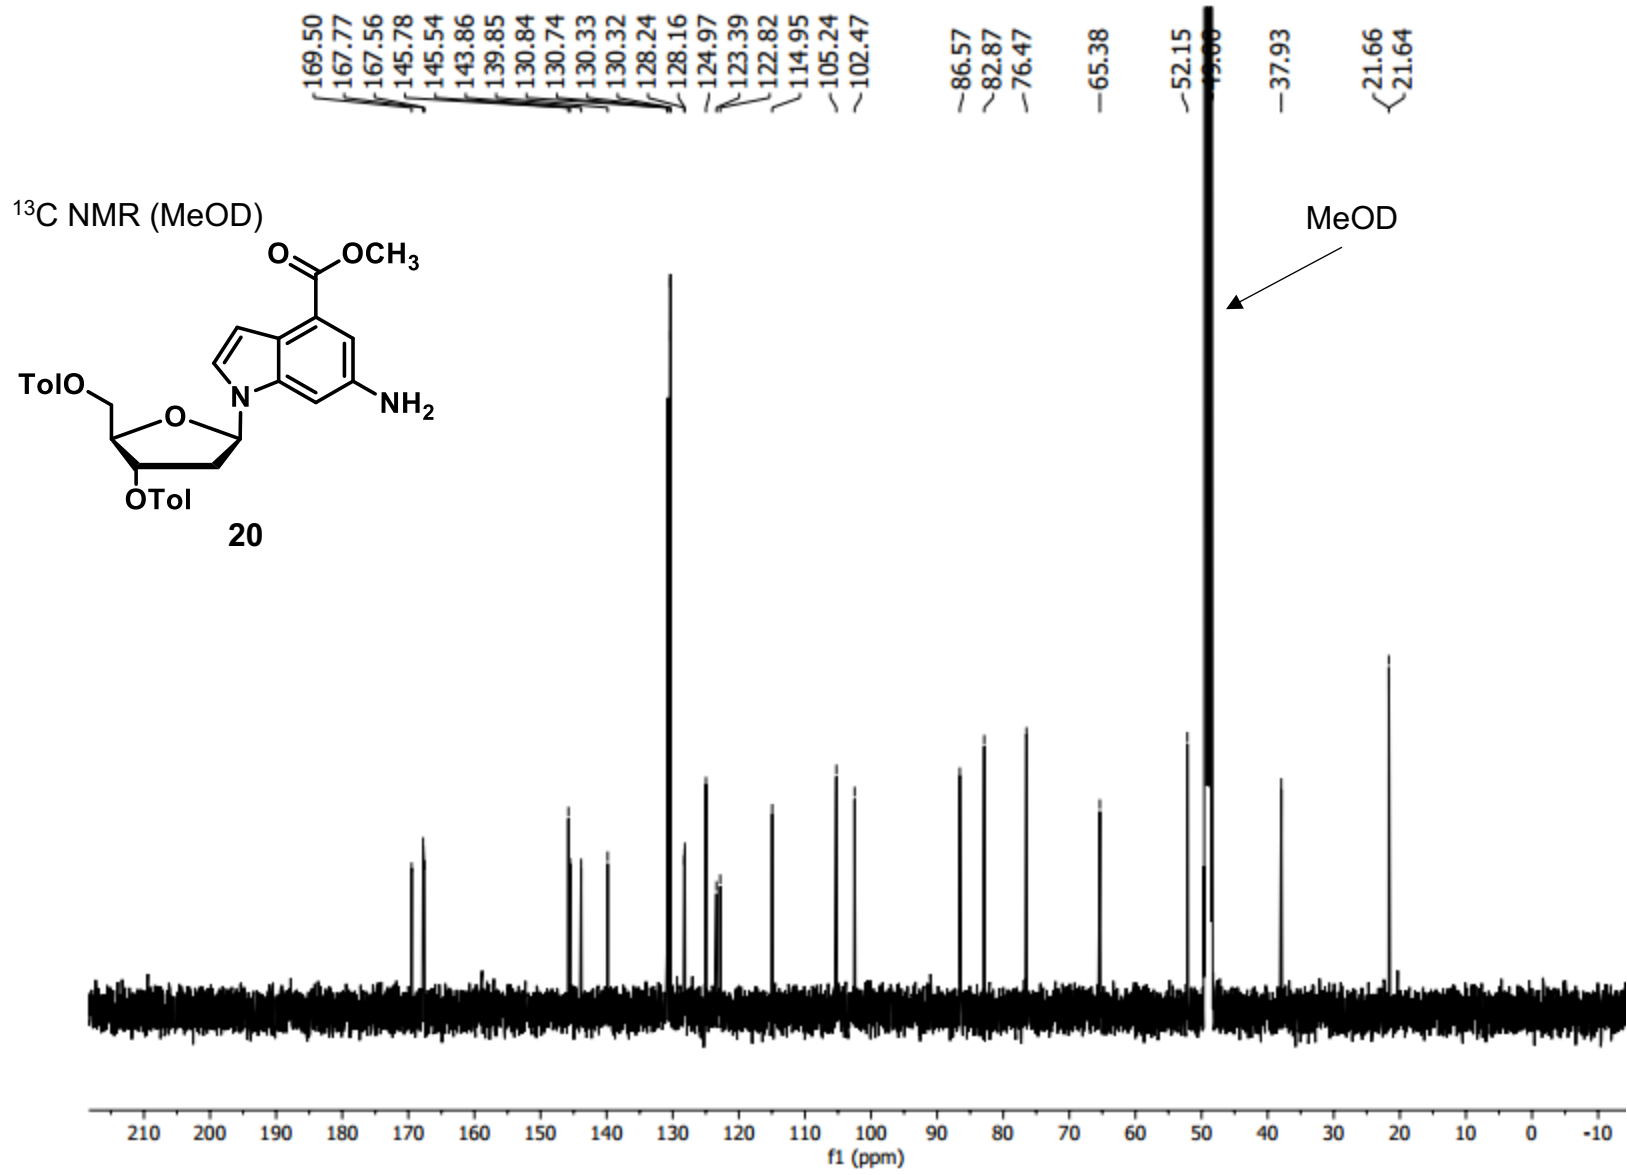

<sup>1</sup>H NMR (MeOD)

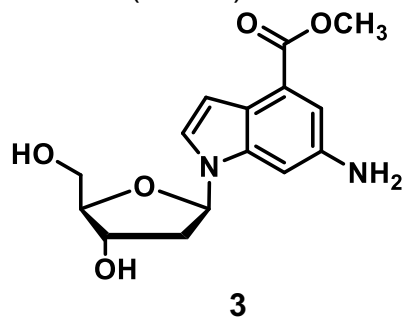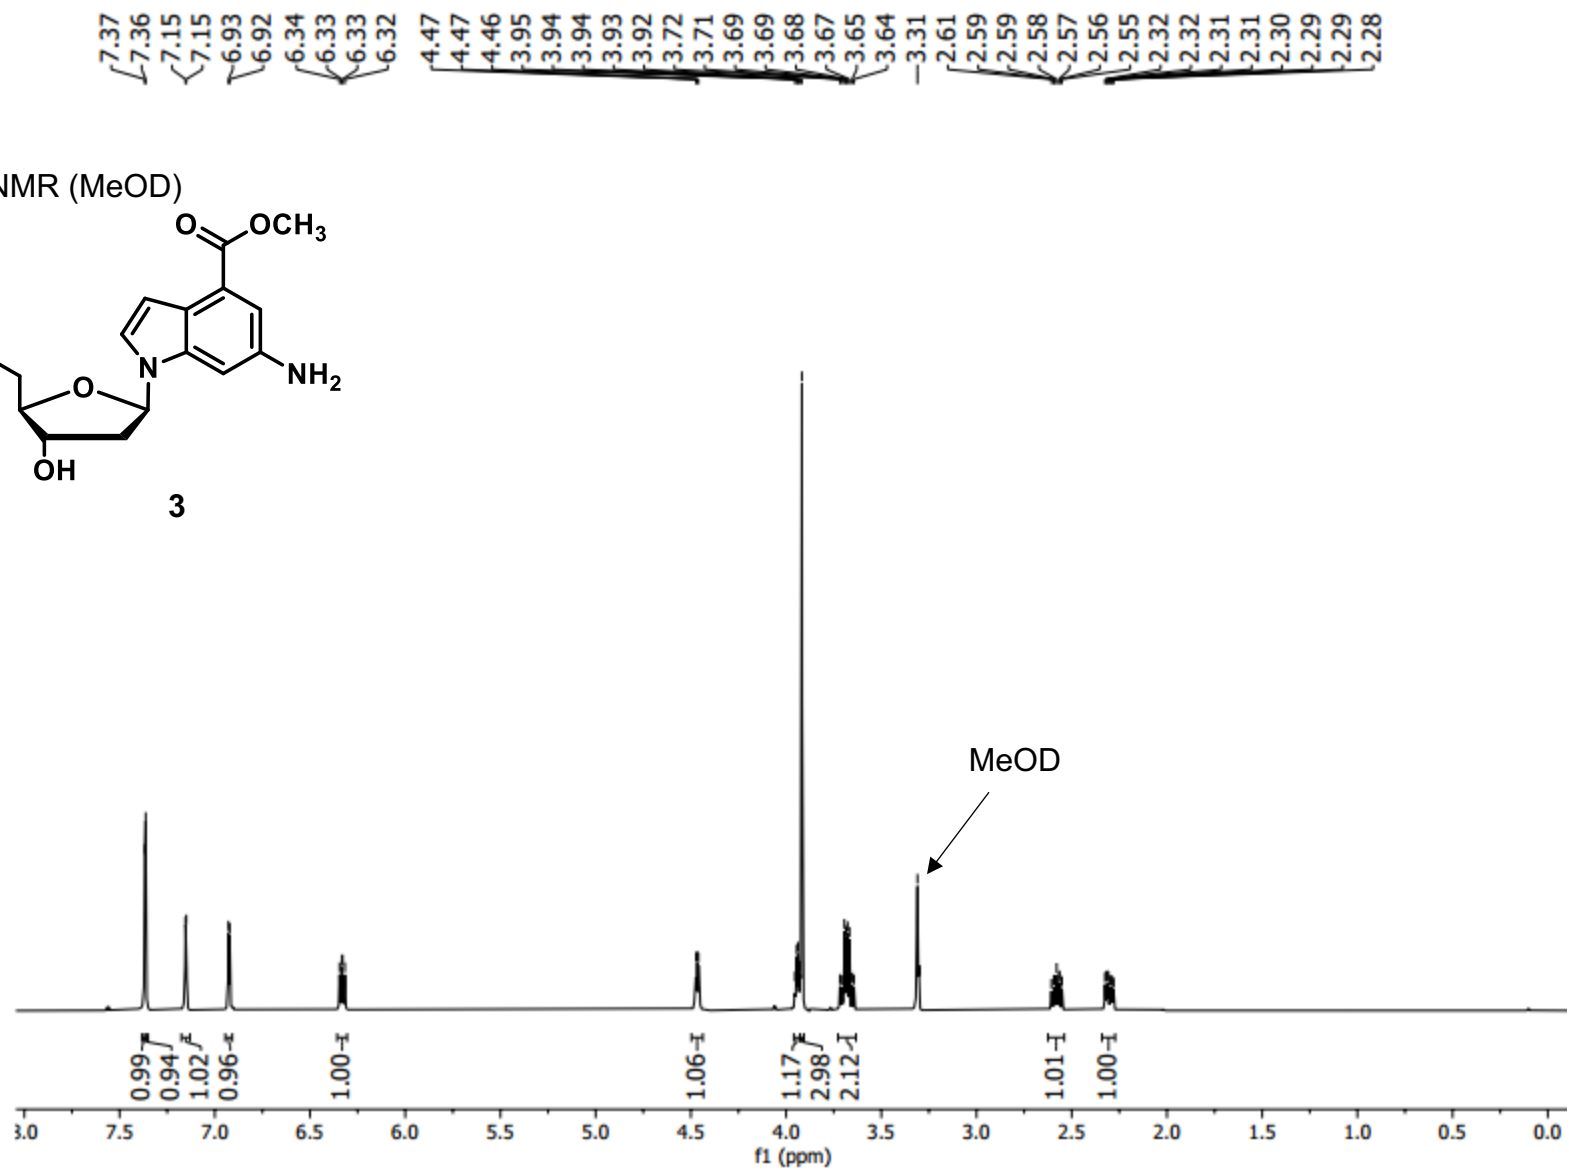



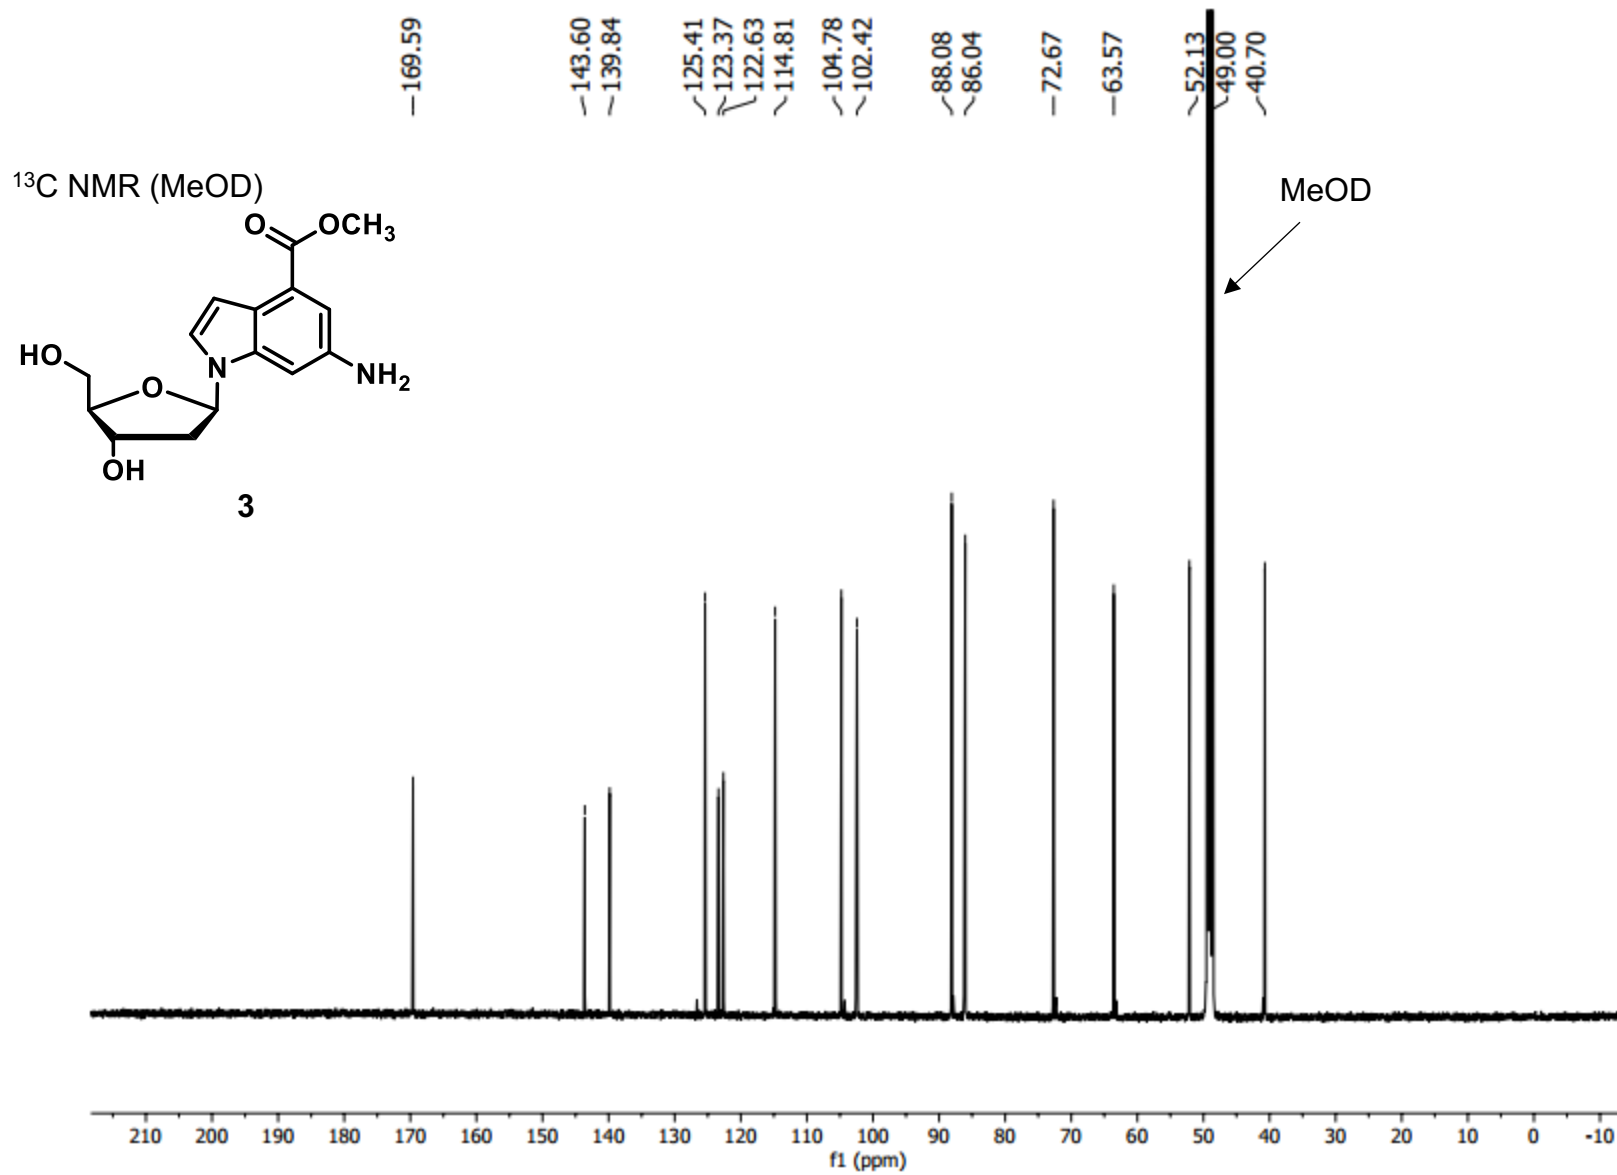

<sup>1</sup>H NMR (MeOD)

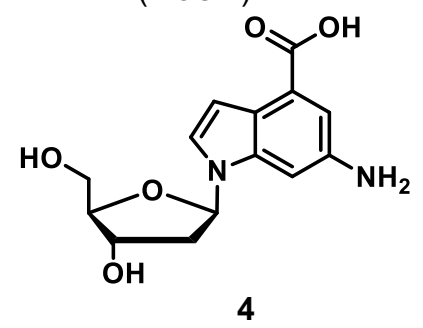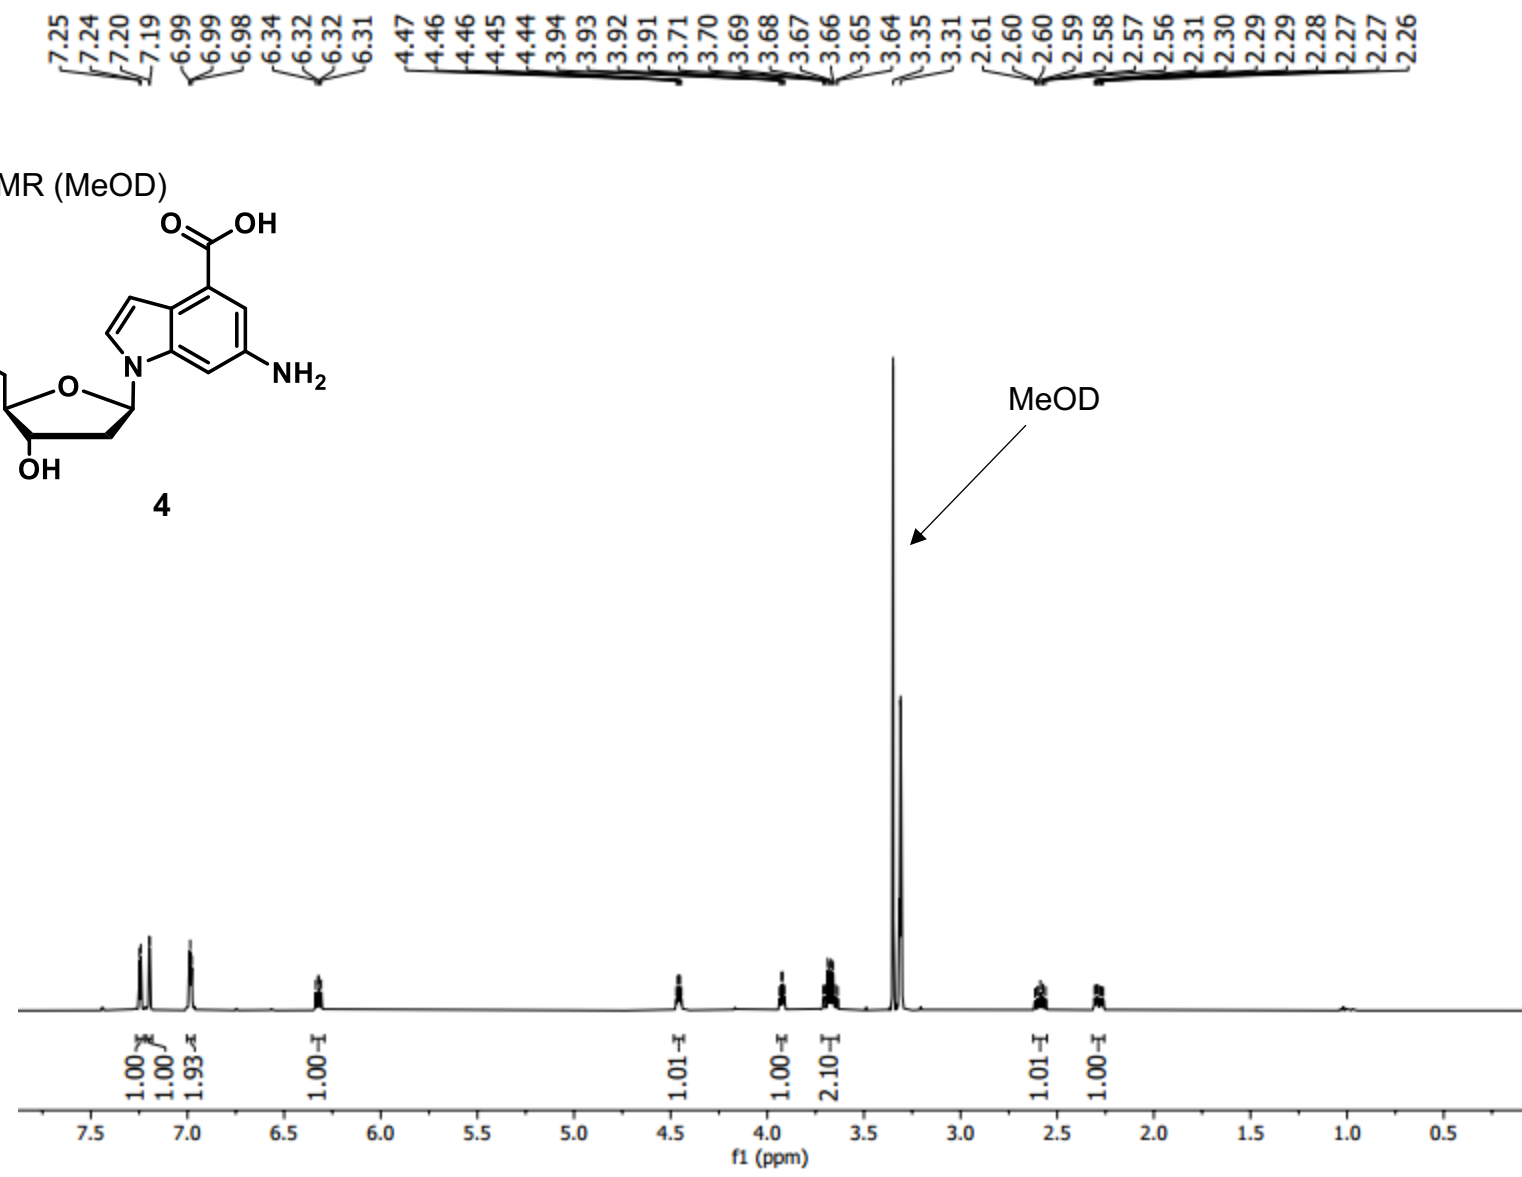

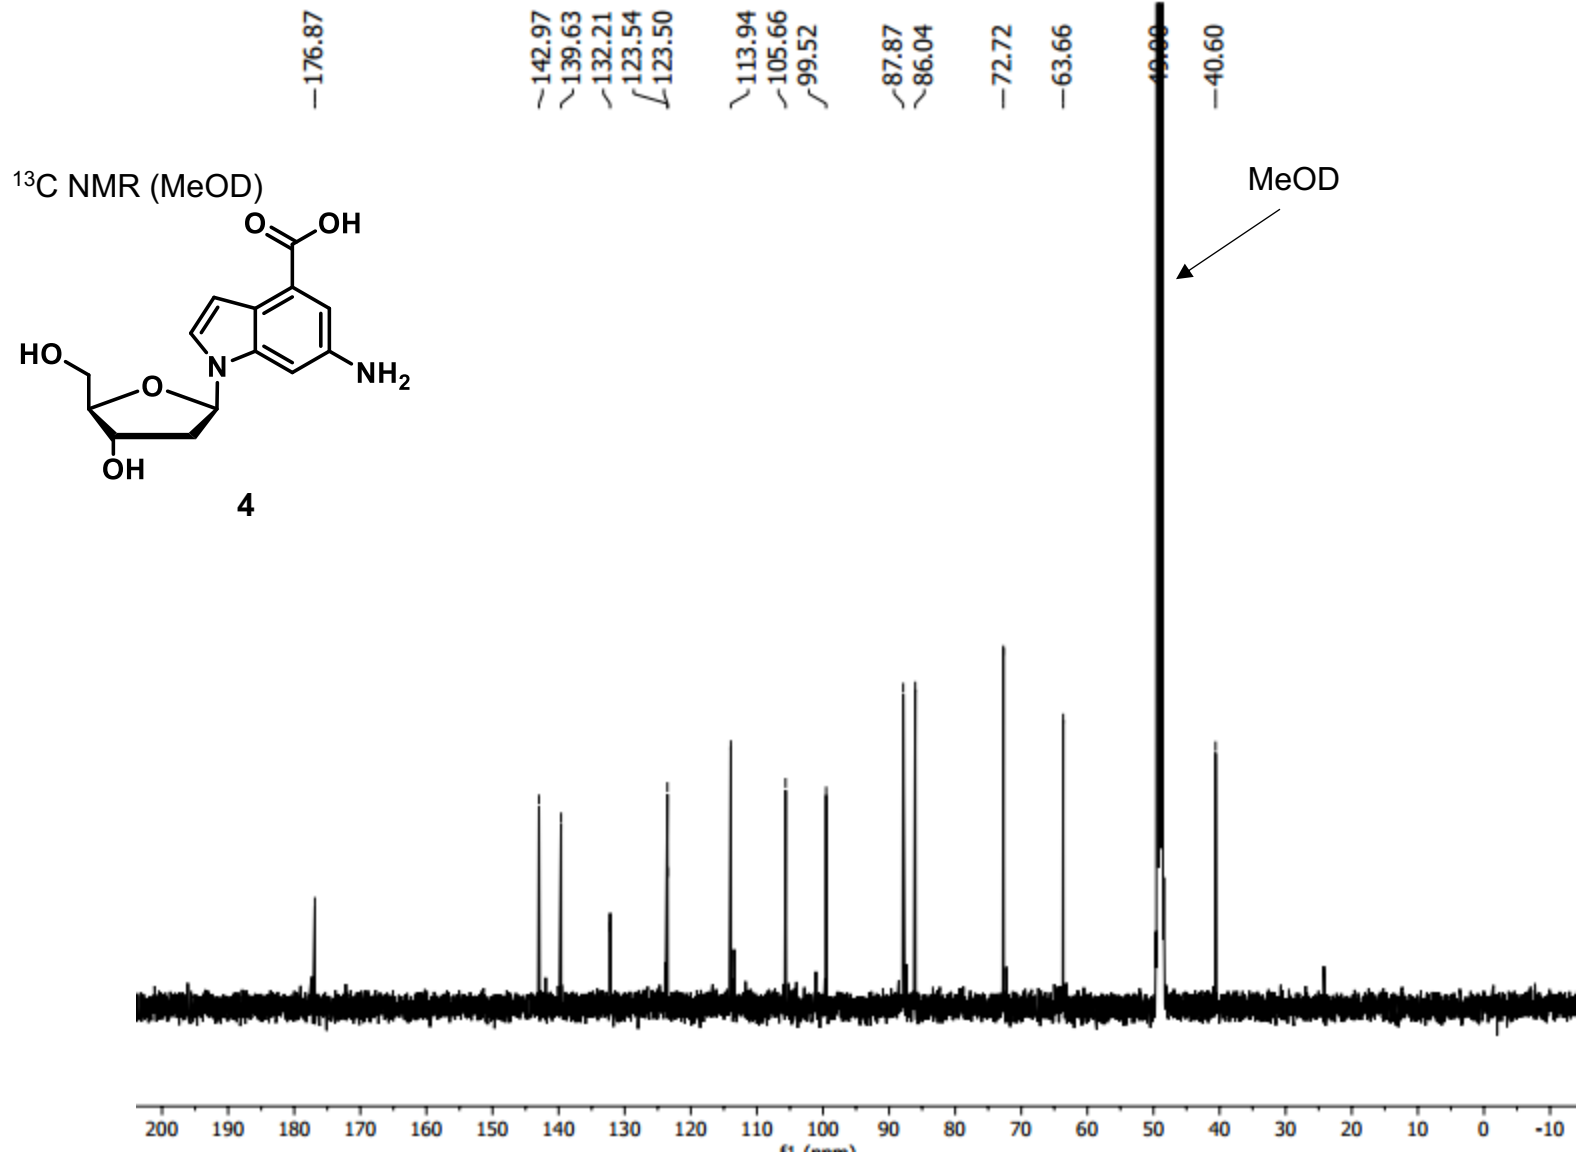

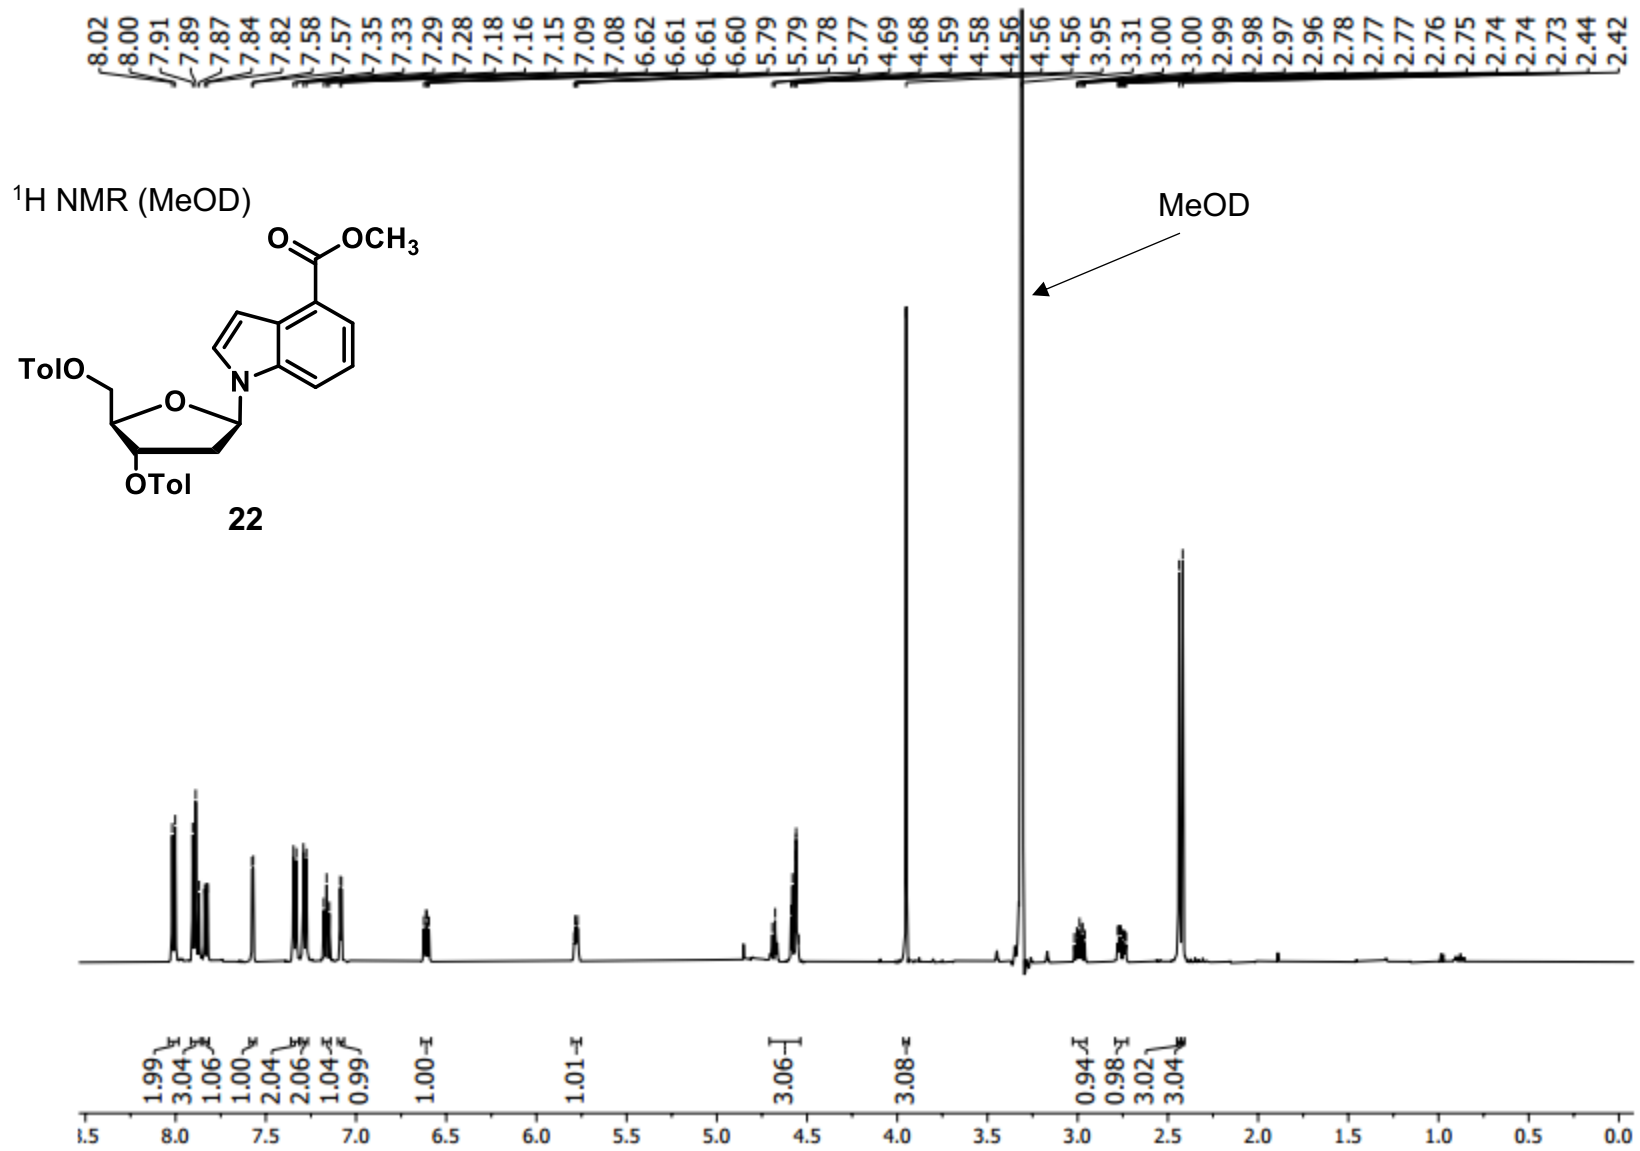

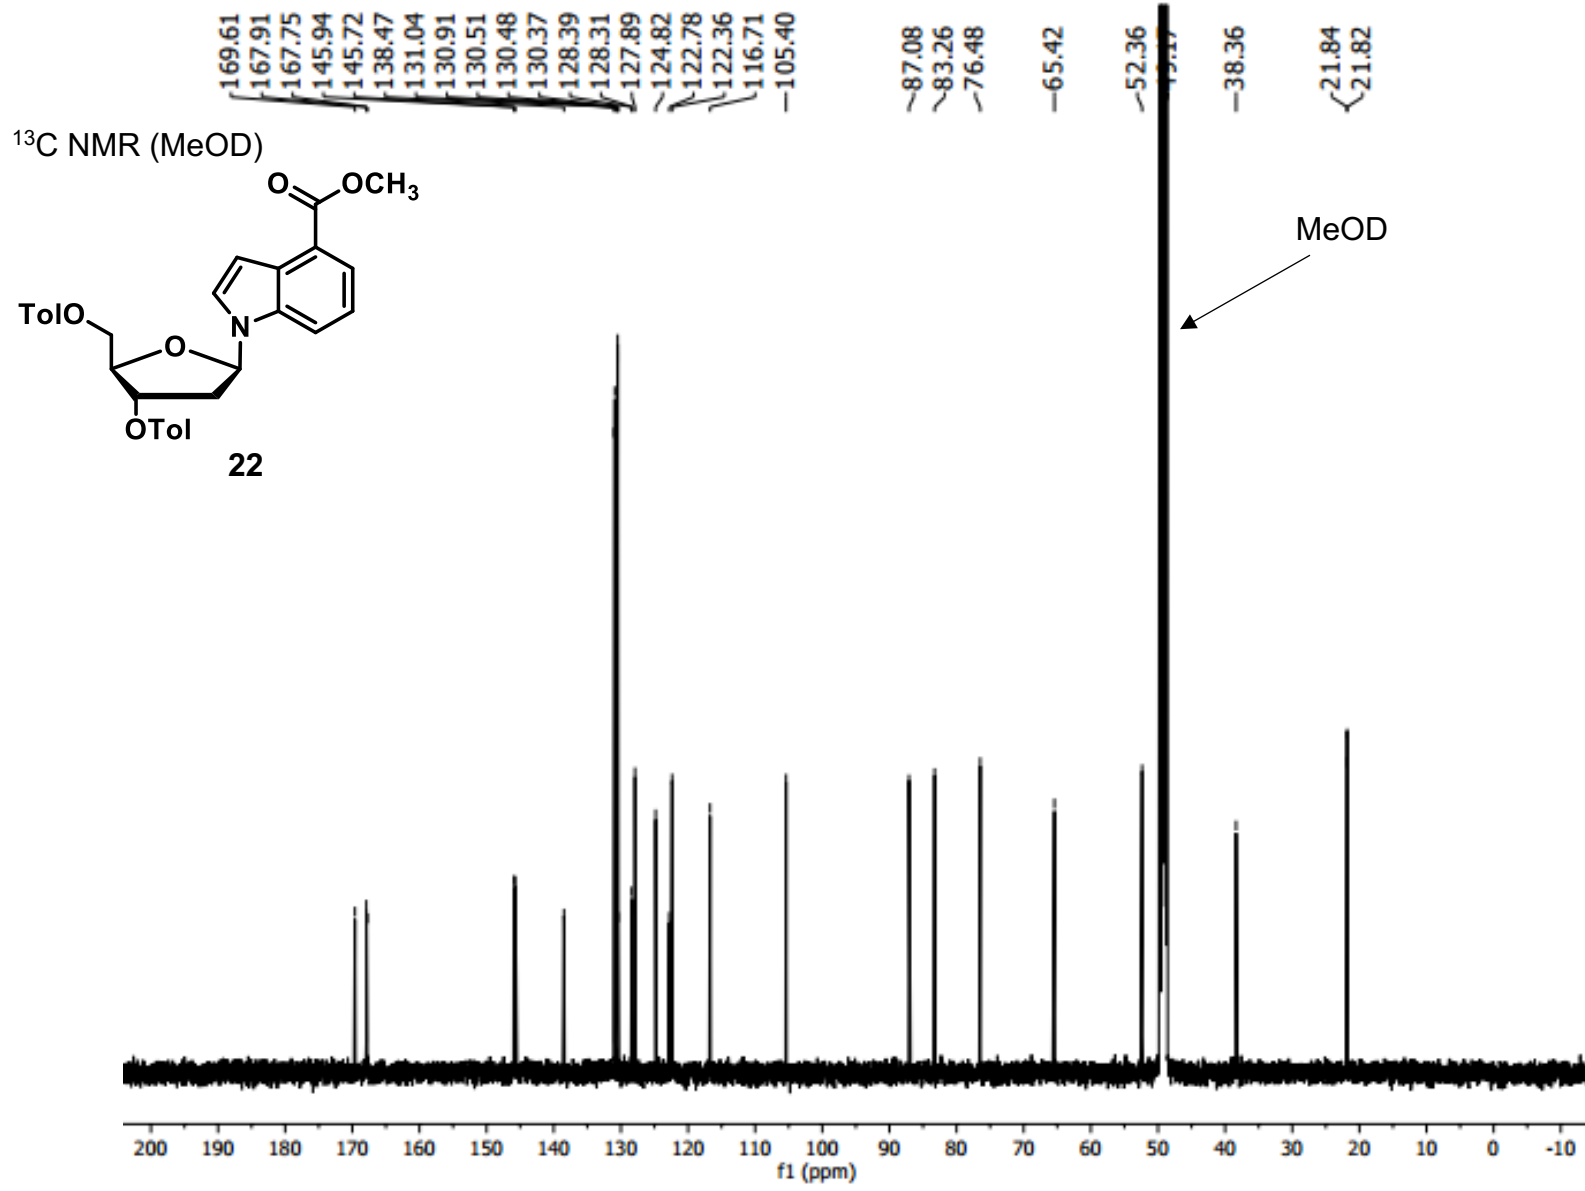

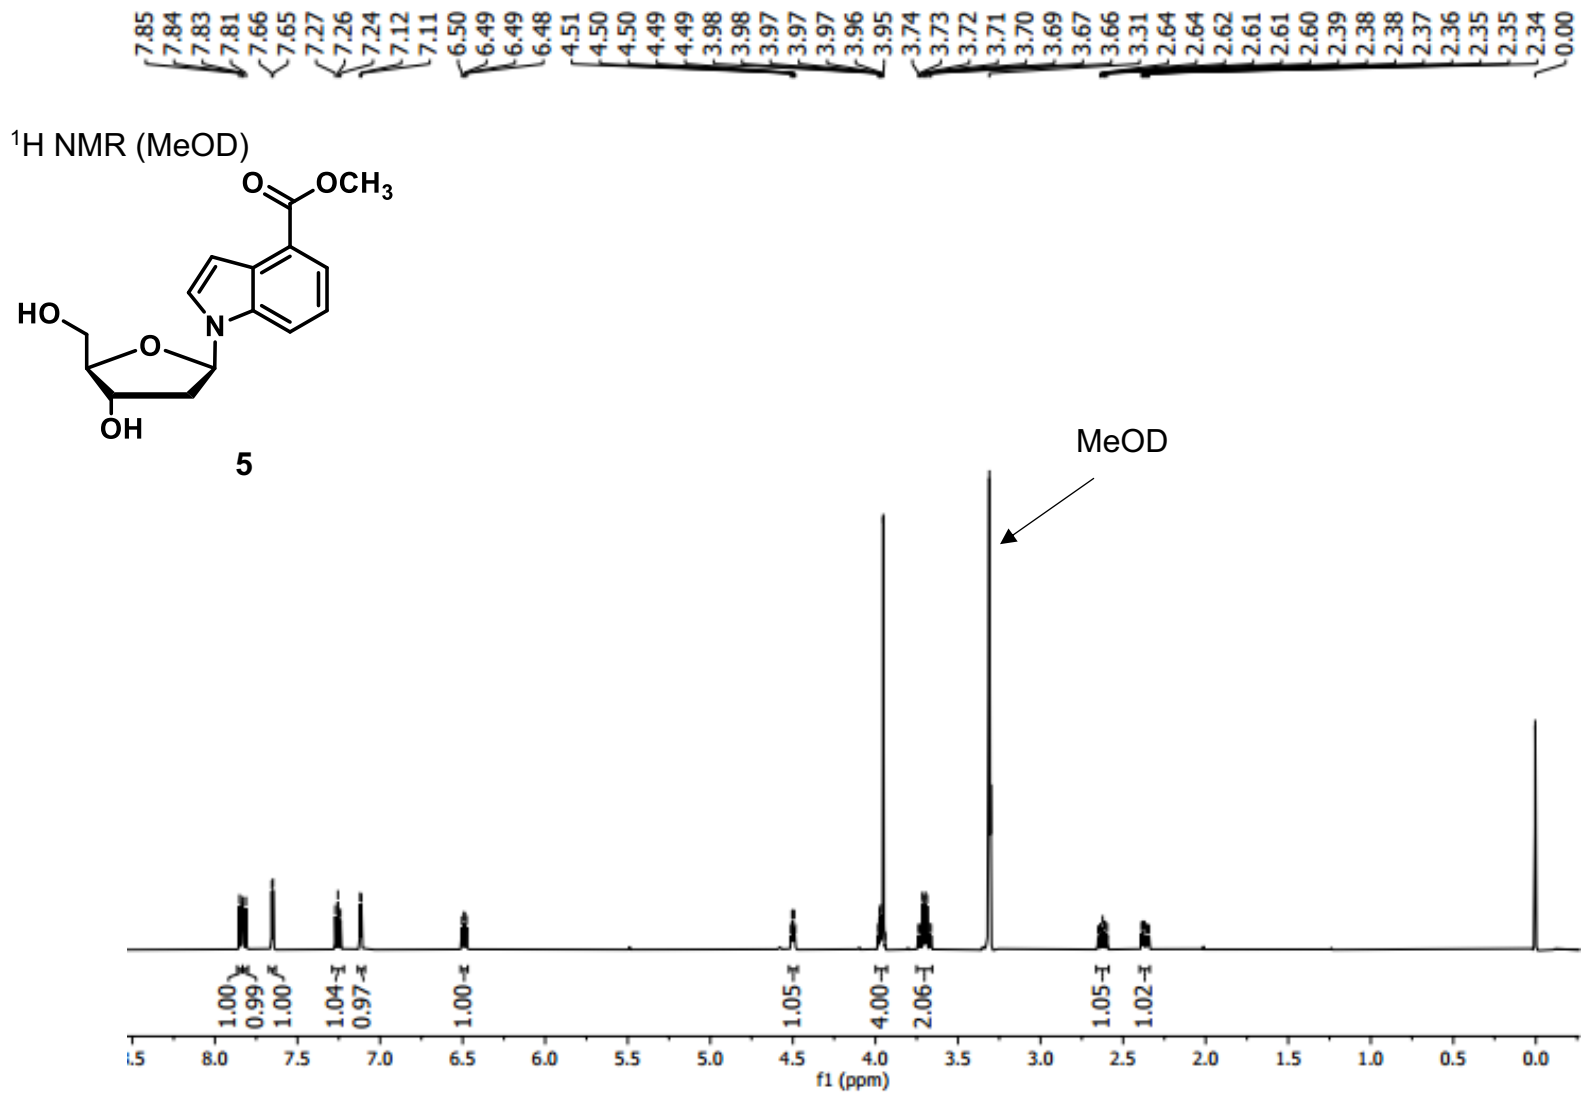

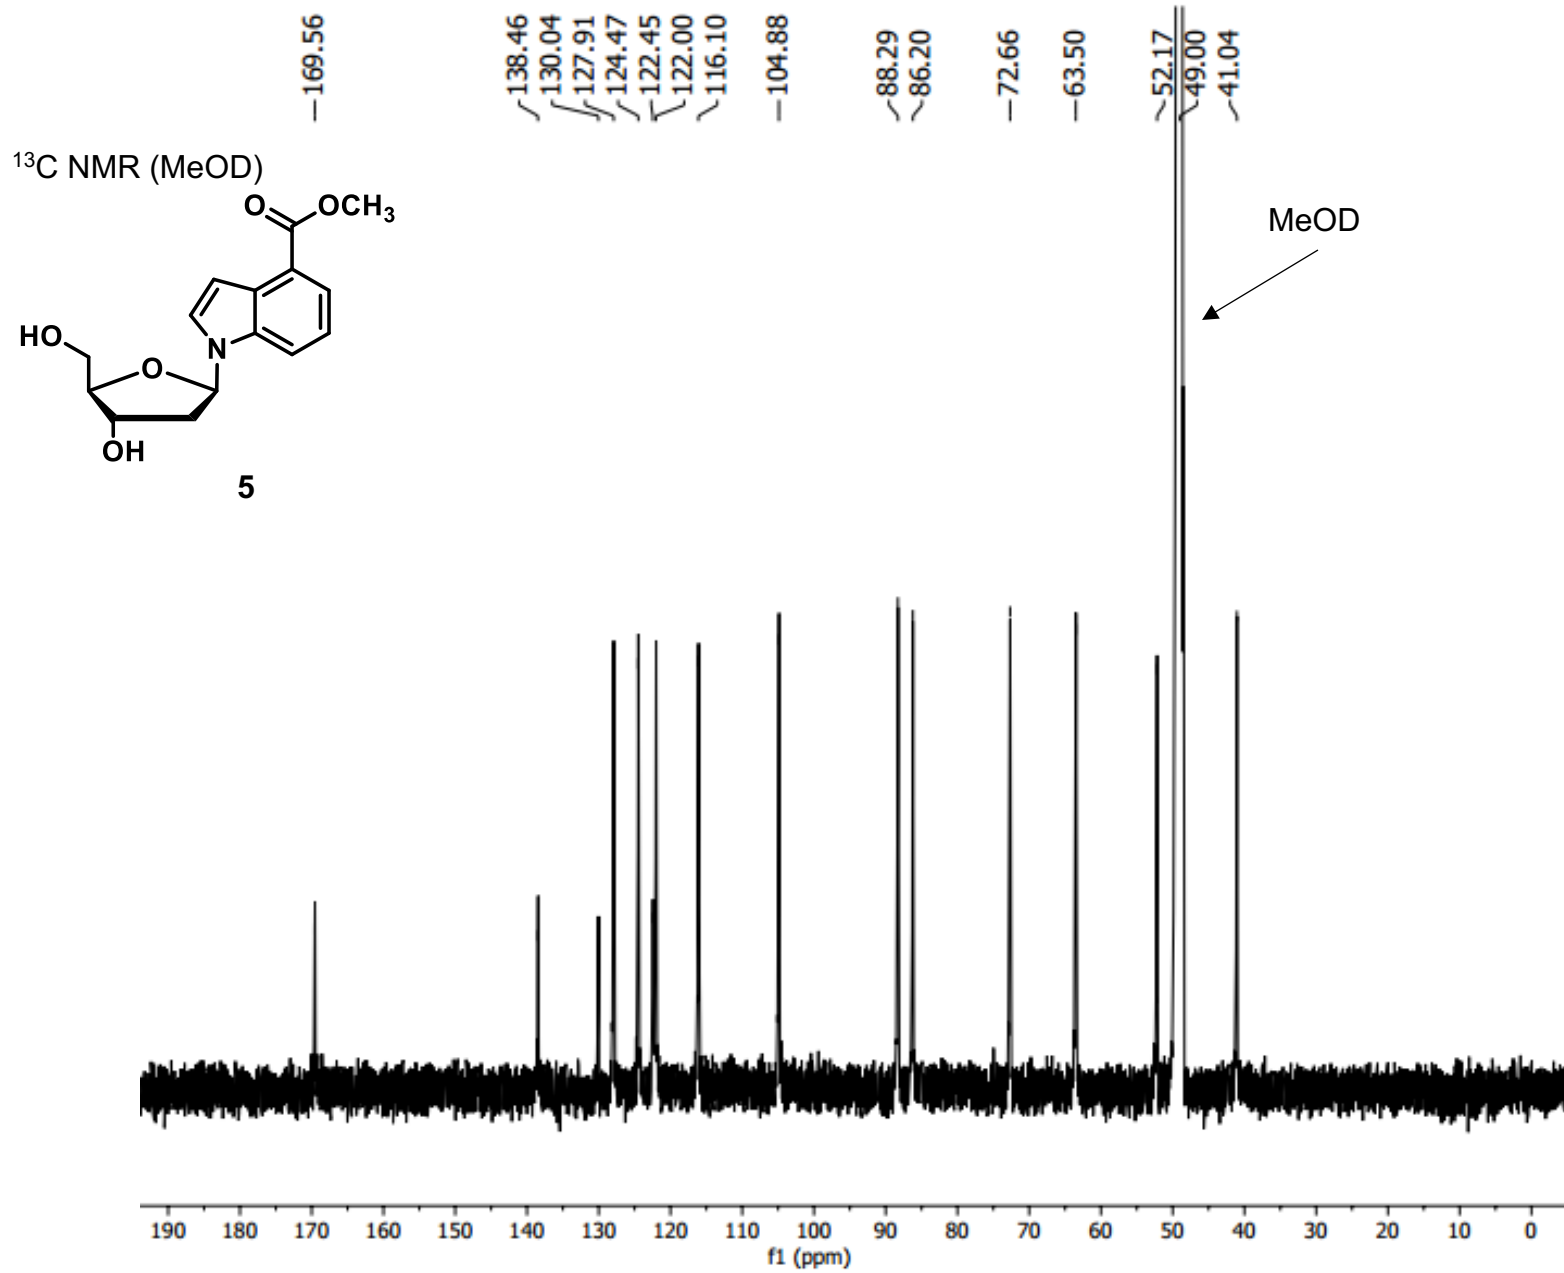

7.86  
7.84  
7.79  
7.78  
7.62  
7.61  
7.25  
7.24  
7.22  
7.15  
7.14  
6.49  
6.48  
6.48  
6.47

4.51  
4.50  
4.49  
4.49  
4.48  
3.99  
3.98  
3.97  
3.96  
3.74  
3.73  
3.71  
3.71  
3.69  
3.68  
3.67  
3.66  
3.31  
2.64  
2.63  
2.62  
2.61  
2.60  
2.60  
2.58  
2.38  
2.37  
2.37  
2.36  
2.35  
2.35  
2.34  
2.34

<sup>1</sup>H NMR (MeOD)

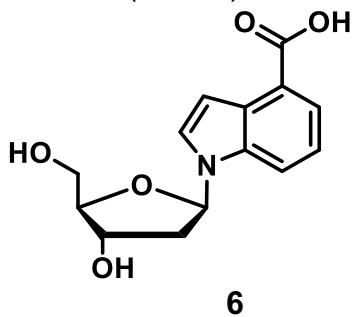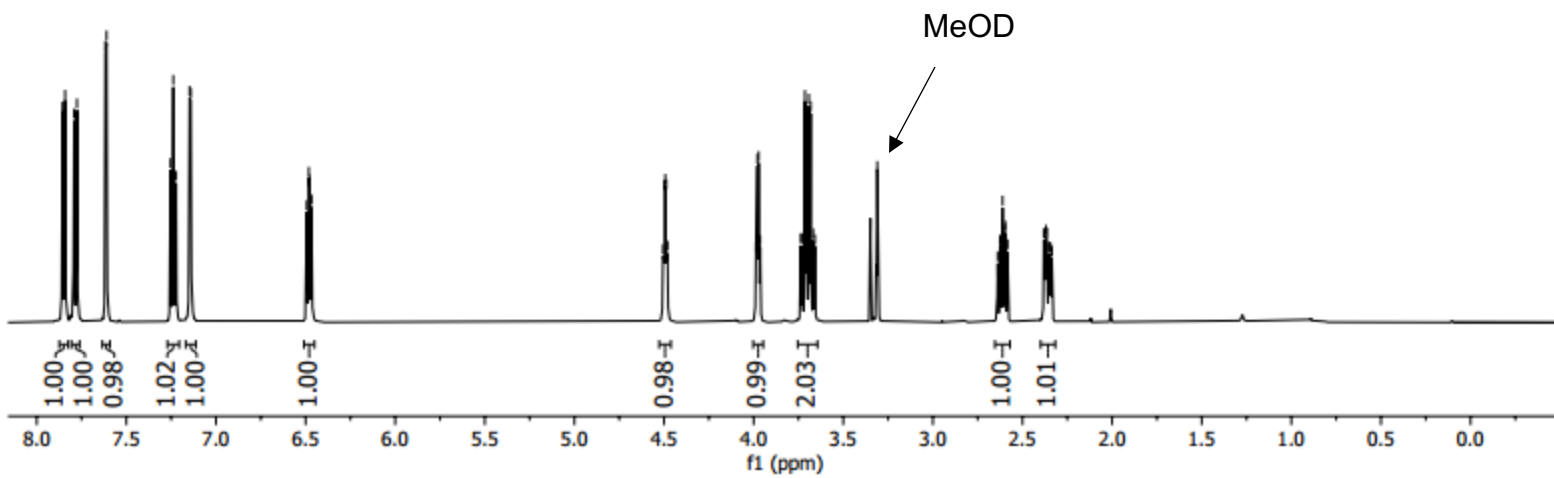



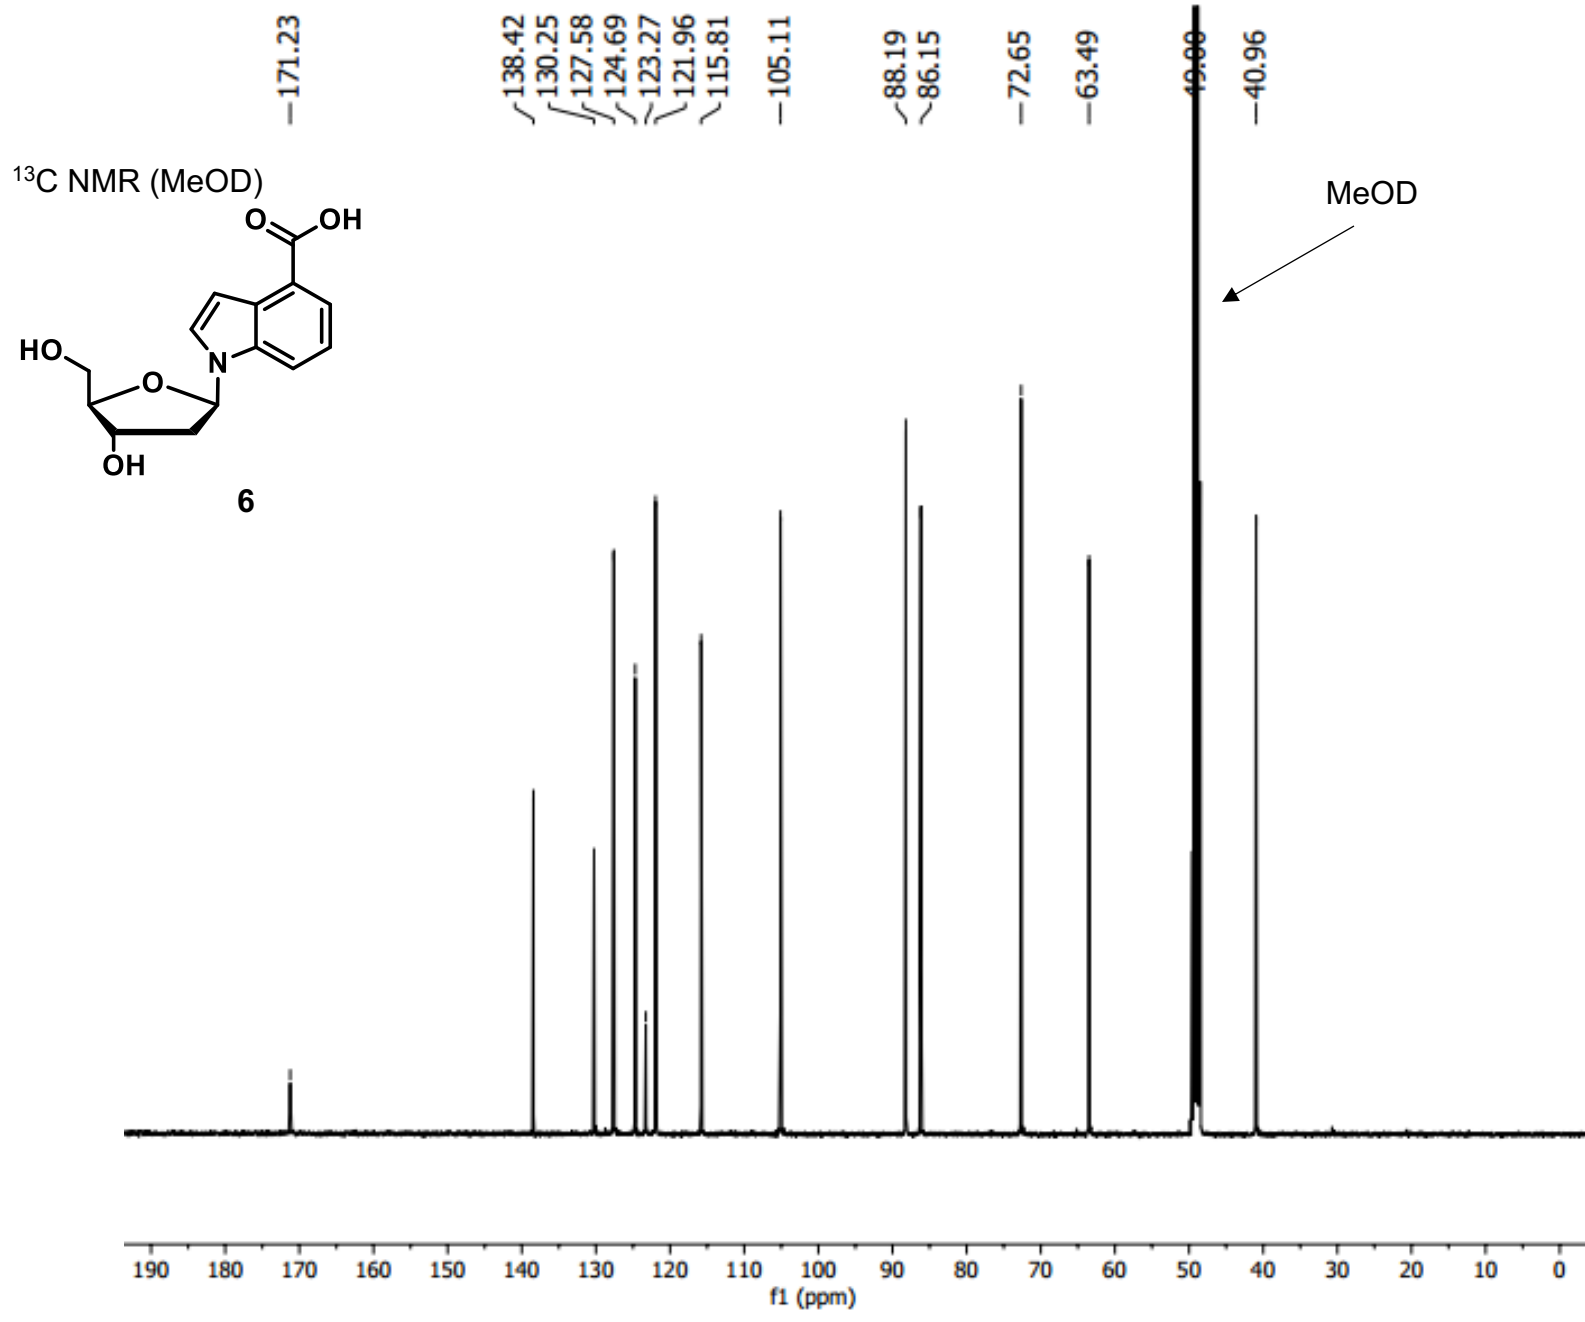

Supplement: d3ra03457g1.pdf [file d3ra03457g1.pdf]
